1  
2 **Quantitative mapping of autophagic cargo during nutrient stress reveals YIPF3-YIPF4 as membrane**  
3 **receptors for Golgiphagy**

4  
5 Kelsey L. Hickey<sup>#,1,2</sup>, Sharan Swarup<sup>#,1,2,^</sup>, Ian R. Smith<sup>1</sup>, Julia C. Paoli<sup>1,2</sup>, Joao A. Paulo<sup>1</sup>, J. Wade Harper<sup>1,2</sup>

6  
7 Affiliations:

8 <sup>1</sup>Department of Cell Biology, Harvard Medical School, Boston MA, USA

9 <sup>2</sup>Aligning Science Across Parkinson's (ASAP) Collaborative Research Network, Chevy Chase, MD 20815,  
10 USA

11 <sup>#</sup> These authors contributed equally to this work.

12 <sup>^</sup> Current address: Casma Therapeutics, Cambridge MA

13  
14 Corresponding author: [wade\\_harper@hms.harvard.edu](mailto:wade_harper@hms.harvard.edu)

15

16 **ABSTRACT:**

17  
18 **During nutrient stress, macroautophagy is employed to degrade cellular macromolecules, thereby**  
19 **providing biosynthetic building blocks while simultaneously remodeling the proteome. While the**  
20 **machinery responsible for initiation of macroautophagy is well characterized, our understanding of**  
21 **the extent to which individual proteins, protein complexes and organelles are selected for autophagic**  
22 **degradation, and the underlying targeting mechanisms is limited. Here, we use orthogonal proteomic**  
23 **strategies to provide a global molecular inventory of autophagic cargo during nutrient stress in**  
24 **mammalian cell lines. Through prioritization of autophagic cargo, we identify a heterodimeric pair**  
25 **of membrane-embedded proteins, YIPF3 and YIPF4, as receptors for Golgiphagy. During nutrient**  
26 **stress, YIPF4 is mobilized into ATG8-positive vesicles that traffic to lysosomes as measured via**  
27 **Golgiphagy flux reporters in a process that requires the VPS34 and ULK1-FIP200 arms of the**  
28 **autophagy system. Cells lacking YIPF3 or YIPF4 are selectively defective in elimination of Golgi**  
29 **membrane proteins during nutrient stress. By merging absolute protein abundance with autophagic**  
30 **turnover, we create a global protein census describing how autophagic degradation maps onto**  
31 **protein abundance and subcellular localization. Our results, available via an interactive web tool,**  
32 **reveal that autophagic turnover prioritizes membrane-bound organelles (principally Golgi and ER)**  
33 **for proteome remodeling during nutrient stress.**

34  
35 **One-Sentence Summary:**

36 During nutrient stress, macroautophagy uses organelle-phagy receptors to prioritize recycling of Golgi and  
37 ER membrane proteins.

38  
39 **INTRODUCTION:**

40 Mammalian cells remodel their proteomes in response to changes in nutrient stress through  
41 transcriptional, translational, and degradative mechanisms (1). Central to these responses are proteasomal  
42 and autophagy-dependent degradative mechanisms that remove superfluous or damaged organelles and

43 proteins to allow recycling of building blocks for cellular remodeling (2). Macroautophagy in response to  
44 reduced mTOR activity during nutrient stress has long been considered to result in non-specific capture of  
45 bulk cytoplasmic contents within autophagosomes, the biogenesis of which is dependent upon the VPS34  
46 PI3P kinase, ULK1-FIP200 kinase complex, and core autophagy proteins (ATG9A, WIPI1/2, and the  
47 ATG8 lipidation machinery among others) (3, 4). However, recent work has revealed that selective forms  
48 of endoplasmic reticulum (ER) degradation by autophagy may be “hard-wired” into a broad autophagic  
49 response to nutrient stress (5-10). With ER-phagy, multiple partially redundant transmembrane ER proteins  
50 function as receptors to recruit core autophagy machinery, including the ULK1-FIP200 kinase complex (6),  
51 to initiate phagophore biogenesis proximal to the ER membrane (10). LC3-interaction regions (LIRs) within  
52 these receptors associate with the LIR docking site (LDS) in lipidated ATG8 proteins (6 orthologs in  
53 humans – MAP1LC3A, B, C and GABARAP, L1, L2) to facilitate ER engulfment within the phagophore  
54 (10).

55 Beyond ER-phagy, we have a limited understanding of the extent to which specific cargo are  
56 selected during macroautophagy and how cargo specificity is achieved. For example, widely studied  
57 ubiquitin-binding cargo adaptors that function in recognition of ubiquitylated autophagic cargo appear to  
58 play limited roles in cargo selection during nutrient stress, although two such receptors (NBR1 and  
59 TAX1BP1) have been linked with endosomal targeting and lysosomal degradation via the endosomal  
60 sorting complexes required for transport (ESCRT) system (11, 12). As such, several questions have  
61 emerged that are central to the field: 1) What proteins, protein complexes, and organelles are susceptible to  
62 autophagic degradation during nutrient stress? 2) Are there additional pathways for selective cargo  
63 degradation within the macroautophagy program and if so, how are these programs controlled? 3) How  
64 does the fraction of protein molecules degraded by autophagy scale with the total abundance of that protein  
65 within the cell and across individual sub-cellular compartments? In short, how selective is macro-  
66 autophagy? Here, we combine quantitative global proteomics in autophagy proficient and deficient cells,  
67 ATG8-driven proximity biotinylation, and absolute protein abundance measurements to systematically map  
68 proteome and organelle responses to nutrient stress across sub-cellular compartments. Using these

69 approaches coupled with an autophagic cargo prioritization scheme, we have generated a high confidence  
70 autophagy factor database, and through this, identified a pathway for selective autophagy of Golgi  
71 membrane proteins. Additionally, we have developed a ‘protein census’ describing how autophagic  
72 degradation maps onto protein abundance and sub-cellular localization across the proteome, to  
73 comprehensively define the selectivity of macroautophagy during nutrient stress.

74

## 75 **RESULTS:**

### 76 **Orthogonal proteomic approaches for Organelle-phagy receptor identification**

77 Our previous studies using global proteome abundance analysis in HEK293, HEK293T, and  
78 HCT116 cells during amino acid (AA) withdrawal or MTORC1 inhibition with the small molecule inhibitor  
79 Torin1 (Tor1) revealed autophagy-dependent loss of on average ~8% of ~310 ER proteins (**Figure 1A**), but  
80 with little evidence of autophagy-dependent reduction in proteins from other compartments. (**fig. S1A**) (5,  
81 13). Interestingly, AA withdrawal or MTORC1 inhibition resulted in ~10% reduction in Golgi membrane  
82 and associated proteins as annotated in Uniprot and this was blocked in cells lacking ATG7 or FIP200 (also  
83 called RB1CC1), components of the autophagy conjugation and initiation machinery, respectively (**Figure**  
84 **1A and fig. S1A**). While multiple membrane-embedded autophagy receptors that are selective for turnover  
85 of ER by autophagy have been reported, membrane-embedded proteins that are selective for Golgi turnover  
86 by autophagy are lacking (5-10, 14, 15).

87 To search for candidate Golgiphagy receptors during nutrient stress, we employed two approaches  
88 in parallel: 1) global quantitative proteomics with and without ATG7 in the same tandem mass tagging  
89 (TMT) plex in order to directly reveal autophagy-dependent changes in protein abundance, and 2) ATG8-  
90 driven proximity biotinylation (16). Our expectation, based in part on the behavior of ER-phagy receptors  
91 (5), is that candidate Golgiphagy receptors would decrease in abundance to a greater extent than Golgi  
92 proteins broadly, allowing their identification by global proteomics. In addition, we expect that relevant  
93 receptors would be in proximity with ATG8 proteins during the autophagy process, in an LDS dependent

94 manner, allowing their identification by time-resolved proximity biotinylation with APEX2-ATG8 proteins  
95 (5).

96 HEK293 or HeLa cells with or without ATG7 were subjected to 12 or 18 hours of nutrient stress  
97 (EBSS), respectively, followed by analysis by 10-plex TMT proteomics (**Figure 1B, C, fig. S1B, Data S1**).  
98 Consistent with previous studies, proteins localized in ER and Golgi were reduced in an autophagy-  
99 dependent manner (**Figure 1D**). To identify candidate autophagy receptors and substrates, we calculated  
100 the starvation and ATG7 dependent decrease in protein levels (**Figure 1E, F**). As expected, we observed  
101 reduced levels of several selective autophagy receptors (TEX264, CCPG1, and SQSTM1) as well as ATG8  
102 proteins MAP1LC3B and GABARAPL2 in one or both cell lines and this reduction was dependent on  
103 ATG7 (**Figure 1E, F, fig. S1C-H**) (5, 13). Interestingly, two Golgi proteins – YIPF3 and YIPF4 – stood  
104 out as proteins whose abundance was substantially reduced during starvation and the extent of dependence  
105 on ATG7 was comparable to other well-validated receptors (**Figure 1E, F, fig. S1G, H**).

106 We next employed proximity biotinylation in ATG8 knockout HeLa cells (17) that were  
107 reconstituted with APEX2-ATG8 proteins (MAP1LC3B<sup>-/-</sup> cells reconstituted with APEX2-MAP1LC3B or  
108 GABARAPL2<sup>-/-</sup> cells reconstituted with APEX2-GABARAPL2) (**Figure 2A, B**). To facilitate the  
109 identification of autophagy receptors associate with ATG8 proteins, we also performed analogous  
110 experiments with LDS mutations in GABARAPL2 (Y49A/L50A) or LDS and lipidation mutations in  
111 MAP1LC3B (K51A/G120A) (18). Cells were left untreated or subjected to nutrient stress  
112 (EBSS+BafilomycinA, (BafA)) for 3 hours prior to proximity biotinylation and proteomic analysis using  
113 10-plex TMT (**Figure 2B, Data S2**). BafA treatment blocks lysosomal acidification, thereby blocking  
114 degradation of biotinylated proteins captured by autophagy and delivered to the lysosome. Among the most  
115 enriched proteins for both ATG8s in response to nutrient stress were ubiquitin-binding autophagy receptors  
116 (TAX1BP1, CALCOCO2, CALCOCO1, SQSTM1), ER-phagy receptors (CCPG1, TEX264), and core  
117 autophagy machinery (WIPI2, ULK1, FIP200/RB1CC1, and ATG8 proteins) (**Figure 2C, D, fig. S2A, B**).  
118 This enrichment was dependent on the LDS for known autophagy receptors (**Figure 2C, D, fig. S2C-F**).

119 To generate a prioritized collection of candidate autophagic factors, we first independently ranked  
120 proteins based on the extent of autophagic and starvation-dependent turnover for total proteome. Then we  
121 ranked proteins based on their LDS dependent ATG8 interaction from our APEX2 experiments (see  
122 METHODS). We then summed the individual rankings to generate a composite ranking and further  
123 classified proteins based on the presence of a previously identified or predicted LIR motif (**Figure 2E, Data**  
124 **S3**). The utility of this approach is indicated by the presence of TEX264, CCPG1, SQSTM1 and two ATG8  
125 proteins within the top 10 ranked proteins (**Figure 2E**). The highest ranked Golgi protein (ranked 7<sup>th</sup>) was  
126 YIPF4 (**Figure 2E**). It was also the most strongly enriched Golgi protein with GABARAPL2 and its  
127 proximity biotinylation was dependent on a functional LDS (**Figure 2C, fig. S2A, C, E**). With APEX2-  
128 MAP1LC3B, YIPF4 displayed less enrichment but was nevertheless partially dependent on a functional  
129 LDS (**Figure 2D, S2B, D, F**). In addition, YIPF4 has a predicted LIR motif (**Figure 2E**) (19), making it a  
130 top candidate to be a Golgiphagy receptor.

131

### 132 **LIR-containing YIPF3/4 are in proximity with autophagy machinery during nutrient stress**

133 YIPF3 and 4 are members of a family of Golgi proteins that each contain 5 transmembrane  
134 segments, with a cytosolic N-terminal region and a luminal C-terminal region (**Figure 3A**). Although  
135 poorly studied, a previous report indicates that YIPF3 and YIPF4 can co-immunoprecipitate and are thought  
136 to form heterodimers (20). ColabFold implementation of AlphaFold (21) predicts the formation of a  
137 heterodimer involving interaction between transmembrane helices 1 (G155-T173) and 2 (M184-L208) in  
138 YIPF3 and transmembrane helices 2 (R135-V157) and 5 (L225-T242) in YIPF4, with both N-terminal  
139 regions being largely unstructured (**Figure 3B**). Deletion of YIPF4 in HeLa cells resulted in loss of YIPF3  
140 (**Figure 3C**), indicating that YIPF3 stability likely requires association with YIPF4. Importantly, both  
141 YIPF3 and YIPF4 contain candidate LIR motifs in their cytosolic N-terminal tails, making them accessible  
142 to interactions with ATG8 proteins (**Figure 3A, B**).

143 To explore YIPF3/4 interactions during nutrient stress, we stably expressed APEX2-YIPF3 or  
144 APEX2-YIPF4 (**Figure 3A**) in HeLa cells lacking YIPF3 or YIPF4, respectively, and performed proximity

145 biotinylation after 3 hours of nutrient stress (EBSS+BafA) (**Figure 3D, Data S4**). To determine LIR  
146 dependent interactors, we included APEX2 fusion proteins harboring mutations in the candidate LIR motifs  
147 for both YIPF3 and YIPF4 (**Figure 3A**). Among the most enriched proteins with wild type (WT) YIPF3  
148 and YIPF4 was the ATG8 protein GABARAPL1 (**Figure 3E, F, fig. S3A, B**). These interactions were  
149 partially dependent on a functional LIR motif, indicating that YIPF3 and YIPF4 are in proximity to ATG8  
150 proteins during nutrient stress and providing reciprocal validation of ATG8 proximity biotinylation  
151 described above (**Figure 3E, F, fig. S3C-F**). Additional autophagy factors, including WIPI1/2, ATG3 and  
152 ATG4B proteins, were also enriched, consistent with proximity to proteins involved in phagophore  
153 formation (**Figure 3E, F, fig. S3E, F**) (3).

154

#### 155 **YIPF4-containing vesicles release from Golgi during nutrient stress via autophagy**

156 Previous studies suggest that ER-phagy receptors promote ER capture via templating of  
157 phagophore formation on the ER membrane, with phagophore closure coupled to scission of the ER  
158 membrane (22, 23). To examine YIPF4 mobilization into vesicles during nutrient stress, we first created  
159 WT or FIP200<sup>-/-</sup> HEK293 cells in which the endogenous N-terminus of YIPF4 was edited to append a  
160 monomeric neon green fluorescent protein (mNEON) (**fig. S4A, see METHODS**). mNEON-YIPF4 was  
161 localized to Golgi in untreated cells as indicated by extensive colocalization with the Golgi marker  
162 GOLGB1 (**Figure 4A, fig. S4B, C**). Strikingly, within 3 hours of starvation (EBSS+BafA), numerous  
163 mNEON-YIPF4-positive puncta (~500 nm in diameter) were observed (**Figure 4B, C, fig. S4B, C**). These  
164 puncta depended on the presence of BafA to block mNEON quenching and degradation within the lysosome  
165 (**Figure 4B, C**), and a subset of mNEON-YIPF4 puncta were found to co-localize with LAMP1, indicating  
166 trafficking to the lysosome (**Figure 4C, fig. S4B, C**). Importantly, the formation of these puncta was  
167 abolished in cells lacking FIP200 and in cells treated with a small molecule inhibitor of VPS34 (SAR405,  
168 VPS34i) (**Figure 4D, E, fig. S4B, C**), suggesting an essential role for autophagy in the liberation of YIPF4-  
169 positive vesicles from Golgi during nutrient stress, as is also seen with ER-phagy receptors (22, 23).  
170 Consistent with this, a subset of mNEON-YIPF4 puncta also co-localized with MAP1LC3B puncta, as

171 assessed using immunofluorescence (**Figure 4F, fig. S4D**). As shown in **Figure 3E-F**, the ubiquitin-binding  
172 autophagy receptors SQSTM1, CALCOCO1, and CALCOCO2 (also called NDP52) were identified in  
173 APEX2-YIPF3/4 proximity biotinylation experiments. However, we found that addition of the ubiquitin  
174 E1 activating enzyme inhibitor TAK243 (24) had no effect on the liberation of mNEON-YIPF4 puncta in  
175 response to nutrient stress (**Figure 4G, fig. S4C**), suggesting the absence of a requirement for ubiquitin  
176 conjugation in this process.

177

### 178 **Keima-YIPF3 and YIPF4 undergo autophagic flux and function as reporters of Golgiphagy**

179 To examine Golgiphagic flux in HEK293 cells, we fused the fluorescent Keima protein to YIPF3  
180 and YIPF4 (**Figure 4H**). Keima is a pH-responsive reporter that undergoes a change in chromophore resting  
181 state upon trafficking to the lysosome (pH of  $\sim 4.5$ ), allowing flux measurements in single cells by  
182 determining the ratio of 561 nm/405 nm excitation via flow cytometry (25). We found that both Keima-  
183 YIPF3 and Keima-YIPF4 flux was increased upon nutrient stress and this flux was completely blocked in  
184 FIP200<sup>-/-</sup> cells (**Figure 4I, J**). Thus, like other membrane-bound autophagy receptors (5, 7), Keima-YIPF3  
185 and YIPF4 are Golgiphagy reporters that can report on Golgi trafficking to the lysosome in a manner that  
186 depends on core autophagy machinery.

187

### 188 **Quantitative mapping of autophagy-dependent degradation programs during nutrient stress**

189 The finding that YIPF4-positive vesicles traffic through the autophagy system led us to explore in  
190 detail the identity of Golgi proteins that are degraded by autophagy during nutrient stress, and how this is  
191 integrated into global protein turnover via autophagy. We reasoned that autophagy receptors and cargo  
192 would all behave in a similar manner upon nutrient stress, i.e degraded when autophagy is intact, but not in  
193 autophagy deficient cells. To gain a comprehensive and unbiased understanding of all proteins that behave  
194 in a similar manner to well characterized autophagy clients during nutrient stress, we used a set of known  
195 autophagy proteins (e.g. ER-phagy receptors, ATG8 proteins, CALCOCO1), and calculated the median  
196 value (see **METHODS**) in each condition to construct a consensus profile using our data from **Figure 1**



197 wherein WT or ATG7<sup>-/-</sup> HEK293 cells were treated with or without EBSS for 12 hours (**Figure 5A, fig.**  
198 **S5A, B**). Next, to identify proteins displaying similar condition profile, we calculated the root-mean-square  
199 error (RMSE) for every protein quantified, across all treatments and replicates. This analysis is analogous  
200 to ‘protein correlation profiling’ (26). Proteins with lower total RSME more closely resemble the  
201 normalized abundance profile of known autophagy proteins and ideally should be enriched in receptors or  
202 clients of autophagy (**Figure S5A**). With this approach, we prioritized 732 proteins whose abundance  
203 profile is concordant with starvation and autophagy dependent turnover: decreased abundance with EBSS  
204 treatment that is blocked by deletion of ATG7 (**Figure 5B**). Golgi and ER proteins display lower RMSE  
205 compared to all other organelles, while proteins from cellular compartments such as the nucleus or  
206 ribosomal proteins displayed a high RMSE consistent with their non-involvement in starvation-based  
207 macroautophagy (**Fig. S5C, D**) (13). In parallel, we performed an orthogonal experiment using an  
208 autophagy mutant in a distinct branch of the pathway (FIP200<sup>-/-</sup>) in the context of an alternative nutrient  
209 stress (AA withdrawal) (**Figure 5A, fig. S5E, F**). For AA withdrawal, we prioritized 684 proteins, which  
210 had the lowest RMSE and displayed a profile consistent with autophagy and starvation-dependent turnover  
211 (**Figure 5C, fig. S5G-I**). We refer to these groups of proteins as candidate ‘autophagy’ proteins. We  
212 anticipate that these ‘autophagy’ candidates should prioritize proteins that are degraded by autophagy  
213 during nutrient starvation, potentially decoupling autophagy from other starvation dependent cellular  
214 responses (e.g. alternative pathways such as proteasome or ESCRT-dependent endolysosomal degradation  
215 or translation inhibition).

216 Gene Ontology (GO) analysis of candidate ‘autophagy’ proteins from both types of nutrient stresses  
217 revealed dramatic enrichment in terms linked with ER and Golgi, which were prominently present in the  
218 top 10 terms identified (**Figure 5D**). We next compared these ‘autophagy’ candidate proteins to all other  
219 proteins quantified in the experiments and found that Golgi and ER were the most over-represented sub-  
220 cellular compartment across all compartments examined (**Figure 5E, F**). Upon closer examination of  
221 proteins within the Golgi, we found that this signature is primarily composed of membrane-embedded Golgi  
222 proteins (**fig. S6A**). Across the two independent experiments with distinct types of nutrient stresses, we

223 identified 187 proteins in common in both sets of ‘autophagy’ candidate proteins (**Figure 5G**). The common  
224 proteins, compared with non-overlapping proteins, are even more over-represented in terms of sub-cellular  
225 localization within Golgi and ER (**Figure 5H**). Additionally, Golgi and ER display strong overlap of  
226 proteins compared with other compartments, including the cytosol, that, in turn, have a decreased  
227 proportional overlap between the two distinct nutrient stressors (**fig S6B, C**). By examining the enrichments  
228 of proteins with an autophagic turnover signature and their overlap in two independent experiments, our  
229 analysis revealed selective programs directed toward Golgi and ER within nutrient stress-dependent  
230 macroautophagy (**Figure 5I, see Discussion**).

231

### 232 **Selectivity of YIPF3/4-dependent Golgiphagy for Golgi-membrane proteins**

233 The results described thus far suggest a role for YIPF4 in autophagic turnover of Golgi. To directly  
234 examine this possibility and to determine specific cargo, we included YIPF4<sup>-/-</sup> HEK293 cells in the same  
235 TMT proteomics experiment examining FIP200-dependent cargo upon AA withdrawal (**Figure 5A, fig.**  
236 **S5D, Data S5**). YIPF4<sup>-/-</sup> cells display loss of YIPF3, and therefore may mimic double knock-out cells, but  
237 still respond to AA withdrawal signaling as demonstrated by immunoblotting of cell extracts with anti-p-  
238 4EBP1 or anti-p-ULK1 (**fig. S5D**). Since YIPF4 is a Golgi protein and Golgi is over-represented in the  
239 candidate ‘autophagy’ proteins, we initially examined the behavior of Golgi proteins among this  
240 ‘autophagy’ candidate cohort in cells lacking YIPF4. Golgi proteins fall into two major classes – those  
241 proteins that contain one or more integral transmembrane segments and those that are soluble proteins but  
242 spend part of their life-history in association with the Golgi – which we refer to as Golgi-membrane and  
243 Golgi-associated, respectively. We found that while loss of YIPF4 had no effect on degradation of non-  
244 Golgi proteins during AA withdrawal, YIPF4<sup>-/-</sup> cells displayed an intermediate effect on the abundance of  
245 79 Golgi proteins within the ‘autophagy’ candidate proteins (**Figure 6A**). The contribution of YIPF4 to  
246 Golgi turnover was found to be largely specific to Golgi-membrane proteins, with little effect on bulk Golgi-  
247 associated proteins (**Figure 6A**). The selectivity for Golgi-membrane proteins and the absence of a strong  
248 effect of YIPF4 deletion on the abundance of other sub-cellular compartments is indicated by correlation

249 plots of YIPF4<sup>-/-</sup> and FIP200<sup>-/-</sup> cells with or without AA withdrawal (**Figure 6B, fig. S7A**). In particular,  
250 bulk ER protein abundance was stabilized in FIP200<sup>-/-</sup> cells but unaffected in YIPF4<sup>-/-</sup> cells, highlighting  
251 the specificity of YIPF4 for Golgiphagy (**Figure 6B**). Golgi ‘autophagy’ candidate proteins are displayed  
252 in **Figure 6C** based on their trans-membrane segment disposition, and the extent of stabilization by FIP200  
253 or YIPF4 deletion is indicated. Proteins across all classes of transmembrane segments within the Golgi  
254 proteome were identified, although the majority of Golgi ‘Autophagy’ candidate proteins stabilized upon  
255 YIPF4 depletion contain a single transmembrane segment. Among the Golgi-associated proteins that are  
256 stabilized in FIP200<sup>-/-</sup> cells, 5 out of 23 were stabilized ( $(YIPF4^{-/-} \log_2(-AA/UT) - WT \log_2(-AA/UT)) > 0.2$ )  
257 by YIPF4 deletion (**Figure 6C**), while 30 out of 54 Golgi-membrane proteins were stabilized. Consistent  
258 with our observation in HEK293 cells, correlation plots of YIPF3<sup>-/-</sup> or YIPF4<sup>-/-</sup> and ATG7<sup>-/-</sup> from HeLa cells  
259 also show selectivity for Golgi membrane proteins (**fig. S7B, Data S6**). Thus, both YIPF3 and YIPF4 act  
260 as selective Golgiphagy receptors in two different cell lines.

261 Previous studies concluded that a soluble Ub-binding autophagy adaptor CALCOCO1 is involved  
262 in both Golgi and ER turnover during nutrient stress (14, 15). However, we found that the abundance of  
263 both YIPF3 and YIPF4, as measured by immunoblotting, was reduced in CALCOCO1<sup>-/-</sup> HeLa cells in  
264 response to EBSS (18 hours) to a similar extent as seen in control cells, and this reduction was blocked by  
265 ATG7 deletion in the same experiment (**fig S8A**). Nutrient stress-dependent degradation of the ER-phagy  
266 receptor TEX264 was also not affected in CALCOCO1<sup>-/-</sup> cells (**fig. S8A**). Proteomic analysis of cells  
267 lacking CALCOCO1 in response to EBSS revealed an extent of Golgi-membrane protein turnover  
268 comparable to control cells, while YIPF4<sup>-/-</sup> cells in the same experiment displayed strong stabilization of  
269 Golgi-membrane proteins (**fig. S8B, Data S7**). Taken together, these data indicate that if CALCOCO1 is  
270 involved in Golgi-membrane turnover by autophagy, it functions downstream of YIPF4 or is involved in a  
271 distinct arm of the Golgiphagy response.

272

273

274

## 275 **Proteome census for autophagic cargo degradation with nutrient stress**

276 A central question in the autophagy field concerns how cells determine substrates for autophagy in  
277 response to perturbations while maintaining cellular homeostasis. *a priori*, abundant cellular complexes  
278 might be considered as likely autophagy substrates to provide recycled amino acids without dramatically  
279 impacting cellular homeostasis. However, consistent with previous studies (13), we find that subunits of  
280 abundant cellular complexes such as the ribosome and proteasome do not reflect an autophagy dependent  
281 turnover profile that would be consistent with our candidate ‘autophagy’ proteins (**fig. S9A**). Likewise,  
282 while the cytosol accounts for ~59% of protein content in HeLa cells, other organelles such as Golgi and  
283 ER account for only a small fraction of the proteome (~0.8 and 4.4%, respectively) (27), yet their proteins  
284 are substantially enriched within the candidate ‘autophagy’ proteins identified here. This raises the question  
285 of how autophagic substrates scale with total protein abundance within the cell and across individual sub-  
286 cellular compartments.

287 To address this question, we merged estimates for absolute protein abundance and our quantitative  
288 proteome measurements upon starvation with the goal of providing a ‘proteome census’ for nutrient stress.  
289 Thus, we integrated protein copy number per cell with subcellular residency for protein molecules present  
290 in the cohort of candidate ‘autophagy’ proteins observed with 12 hours of AA withdrawal. First, we  
291 estimated protein copy number per cell using the Proteome Ruler method (28) extrapolated MS<sup>1</sup> signal from  
292 relative TMT intensities (see **METHODS**) in untreated WT cells. We then inferred each protein’s loss in  
293 estimated absolute abundance based on the protein’s relative fold change in starvation conditions. Plots of  
294 autophagy-dependent protein copy number loss for each cellular compartment span ~5 orders of magnitude  
295 in abundance across ~6,800 proteins quantified, indicating that macroautophagy does not only degrade the  
296 most abundant cytosolic, ER, and Golgi proteins (**Figure 6D, fig. S9B**). In fact, the abundance ranks for  
297 ‘Autophagy’ candidate proteins is not significantly different from all other proteins. However, at the level  
298 of sub cellular compartments, organelles display differing degrees of selectivity (**fig. S9C**). Interestingly,  
299 cytosol ‘Autophagy’ candidates show a bias toward less abundant proteins, while ER and Endosome

300 ‘Autophagy’ candidates are biased for more abundant proteins. In contrast, Golgi proteins in the  
301 ‘Autophagy’ candidate show no preference for more or less abundant Golgi proteins.

302         Based on our absolute abundance estimates, we calculated the total number of protein copies per  
303 cell that were degraded for candidate ‘autophagy’ proteins based on their primary subcellular compartment.  
304 The vast majority of protein copies degraded, as a percentage of the total candidate ‘autophagy’ molecules  
305 lost, are contributed by ER, endosome, Golgi, and cytosol, but unexpectedly, the number of protein  
306 molecules contributed by ER and Golgi rivals that of the cytosol (**Figure 6E, Data S8**). Given that  
307 proteasomal or ESCRT-dependent degradation and translational suppression also play a role in determining  
308 protein abundance during starvation (*12, 13*), we calculated the fractional contribution of protein abundance  
309 loss from each candidate ‘autophagy’ protein relative to the total abundance loss during starvation for  
310 individual compartments. ~75% of the reduction in protein abundance of Golgi membrane proteins could  
311 be attributed to the proteins that are prioritized for being turned over by autophagy, with endosomes and  
312 the ER also having a substantial amount of autophagy-based loss (**Figure 6F**). In contrast, only ~3% of the  
313 changes in the copy number of cytosolic proteins could be attributed to the abundance loss from the  
314 candidate ‘Autophagy’ proteins (**Figure 6F**). Analogous results were obtained when our data was mapped  
315 onto absolute abundance estimates previously reported in HEK293T cells (*28*) or derived from MS data  
316 measured by Data Independent Acquisition mass spectrometry (DIA) (**fig. S10A-J**), with absolute  
317 abundance estimates that correlated well with data herein (**fig S10A-J**). Thus, Golgi and ER represent major  
318 targets for autophagy in response to nutrient stress with a larger fraction of their individual proteomes being  
319 subjected to turnover than the cytosol, despite a much larger (>10-fold) copy number of cellular proteins  
320 being present within the cytosol (*27*).

321

## 322 **DISCUSSION:**

323         More than 30% of the cellular proteome is synthesized on the ER and trafficked through the Golgi,  
324 where proteins are modified and sent to other destinations. As such, these organelles are critical for cellular  
325 and organismal viability. Here we developed a prioritization strategy to categorize putative autophagy

326 factors using complementary proteomic methods. This analysis allowed us to detail a pathway that mediates  
327 Golgi-membrane protein remodeling by autophagy in response to nutrient stress, thereby extending our  
328 understanding of mechanisms underlying the removal of membrane-bound organelles during starvation  
329 beyond well-studied ER-phagy pathways (10). We demonstrate that the Golgi resident protein YIPF4 is  
330 mobilized into vesicles in an autophagy-dependent process, is degraded by autophagy, and is required for  
331 autophagic degradation of a cohort of primarily Golgi-membrane proteins. Its heterodimeric partner YIPF3  
332 likely functions together with YIPF4 in these processes, as we demonstrate that it also undergoes  
333 Golgiphagic flux, and its deletion led to stabilization of primarily Golgi-membrane proteins during nutrient  
334 stress. We have created a comprehensive Cellular Autophagy Regulation and GOLgiphagy (*CARGO*) web  
335 resource that allows exploration of all data generated reported here (**fig. S11A-C**).

336 In ER-phagy, LIR motifs in multiple transmembrane ER-phagy receptors are thought to nucleate  
337 autophagosome formation through interaction with FIP200/ULK1 and/or ATG8 proteins (10). Further work  
338 is required to understand the biochemical mechanisms underly coupling of YIPF3 and YIPF4 with the  
339 autophagy machinery, as well as whether Golgiphagy can be promoted via other types of signaling  
340 paradigms or is involved in Golgi quality control processes akin to those found with misfolded secretory  
341 proteins in ER-phagy (10). As with ER-phagy, it is possible that additional membrane-embedded Golgi  
342 proteins can promote selective Golgiphagy, possibly in diverse cell types or in response to distinct signals.  
343 Regardless of their specific activation signals or mechanism, our data establish a critical role of YIPF3 and  
344 YIPF4 in remodeling the Golgi proteome during nutrient stress.

345 By combining autophagy deficient cells, starvation, and consensus autophagy substrate profiling  
346 analysis using RMSE, we decoupled autophagic turnover from other mechanisms that decrease protein  
347 abundance during nutrient stress to identify a cohort of proteins that are degraded in an autophagy dependent  
348 manner. Although the RMSE approach may not capture every autophagy substrate (see **METHODS**), the  
349 prioritized collection of candidate ‘autophagy’ substrates nevertheless allowed us to create a ‘proteome  
350 census’ for nutrient stress by merging protein copy number estimates with subcellular compartment data.  
351 Historically, macroautophagy has been viewed as a non-specific process wherein bulk cytoplasmic proteins

352 are captured for lysosomal degradation. Our results suggest an alternative model in which targeted  
353 degradation of ER and Golgi constitute major programs within a larger macroautophagy process (**Figure**  
354 **5H**). Although ER and Golgi collectively accounting for ~6% of the protein copies per cell (27), a selective  
355 subset of their proteins within candidate ‘autophagy’ proteins account for ~50% of all protein copies lost  
356 (**Figure 6E, F, fig. S10A-J**), despite a much larger total copy number for cytosolic proteins within cells  
357 (~59% of cellular proteome) (27). These findings raise the question of whether autophagic degradation of  
358 cytosolic proteins during nutrient stress reflects bystander engulfment during selective autophagy of other  
359 organelles (principally ER and Golgi), or a program for selection/exclusion of specific cytosolic proteins  
360 (**Figure 5I**). Regardless, our data support idea that selective organelle-phagy represents a major component  
361 of macroautophagy. The preference for ER and Golgi could reflect the underlying mechanisms of  
362 membrane-templated autophagosome assembly that is frequently used to capture cargo via selective  
363 autophagy. Alternatively, while ER-derived phospholipids are used to make autophagosomal membranes  
364 via ATG2-dependent transport and are therefore recycled within the lysosome (3), it is possible that ER and  
365 Golgi have been evolutionarily programmed for autophagic targeting in order to provide additional classes  
366 of lipids present in these membranes for recycling in times of nutrient stress.

367

368

369 **FIGURES:**  
370

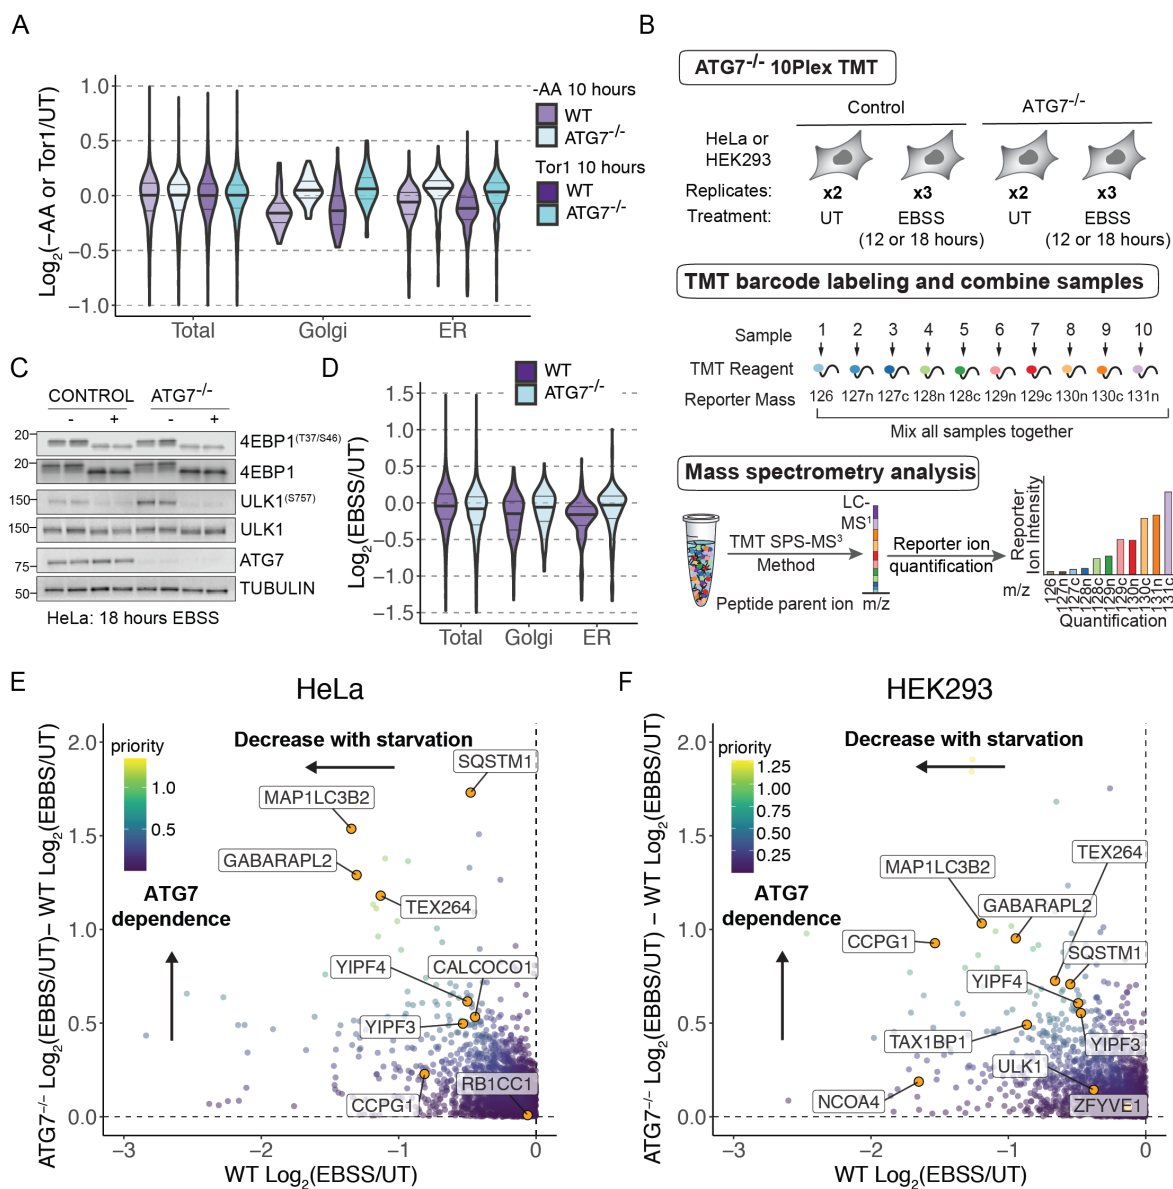

371  
372

373 **Figure 1. Global proteomic analysis of autophagy-dependent proteome remodeling with nutrient**  
374 **stress. (A),** Violin plots of relative total (8,032, 8,412), Golgi (56, 60), and ER (340, 349) protein abundance  
375 in response to amino acid withdrawal or Torin1 treatment (10 hours) in WT or ATG7<sup>-/-</sup> HEK293 cells from  
376 our previous study. **(B)** The 10-plex TMT pipeline to measure relative protein abundance during nutrient  
377 stress with or without active autophagy. Normalized total cell extracts were processed for 10-plex TMT  
378 mass spectrometry (TMT-MS) experiments. EBSS, withdrawal of amino acids and serum; UT, untreated.



379 (C) Western blot showing markers of starvation (ULK1, 4EBP dephosphorylation) and ATG7 in WT and  
380 ATG7<sup>-/-</sup> HeLa cells grown in EBSS for 18 hours. (D) Violin plots of relative total (8258), Golgi (160), or  
381 ER (344) protein abundance in response to EBSS treatment (12 hours) in WT and ATG7<sup>-/-</sup> HeLa cells. (E,  
382 F) Plots of ATG7<sup>-/-</sup> Log<sub>2</sub>(EBSS/UT) – WT Log<sub>2</sub>(EBSS/UT) versus WT Log<sub>2</sub>FC (EBSS/UT) for HeLa cells  
383 (panel E) and ATG7<sup>-/-</sup> Log<sub>2</sub>(EBSS/UT) – WT Log<sub>2</sub>(EBSS/UT) versus WT Log<sub>2</sub>FC (EBSS/UT) for HEK293  
384 cells (panel D) where priority for individual proteins is scaled based on the color code inset. Full plots are  
385 shown in **fig. S1G, H**.

386  
387  
388

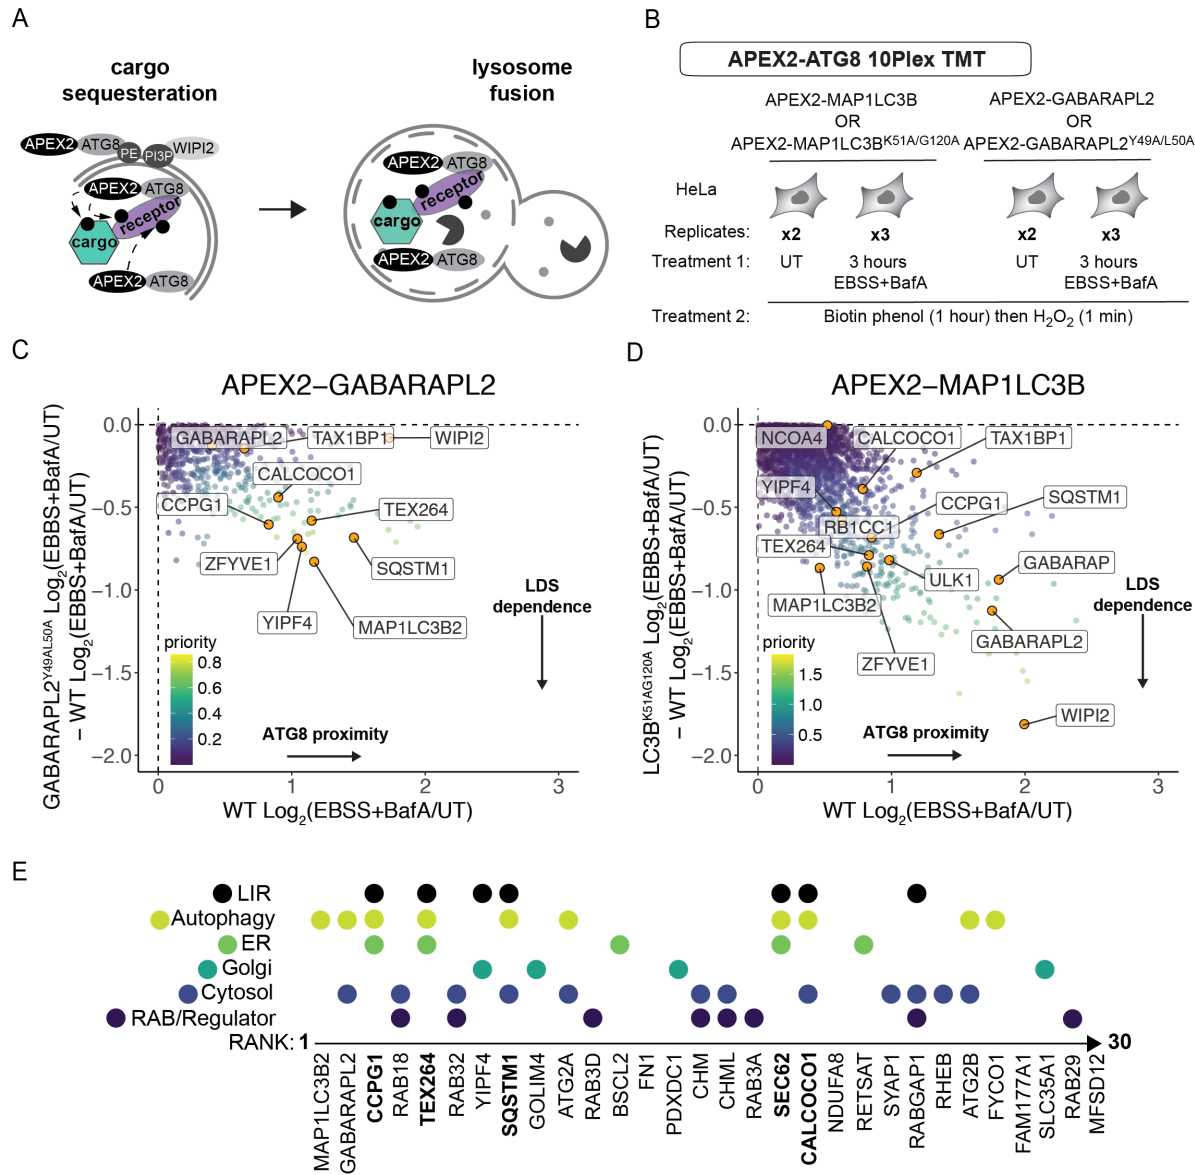

389  
390  
391

392 **Figure 2. ATG8-drive proximity biotinylation identifies candidate Golgiphagy receptors.** (A) Scheme  
393 depicting unbiased identification of ATG8-interacting proteins by proximity biotinylation. APEX2-ATG8  
394 proteins are concentrated on the phagophore during the response to nutrient stress and function to recruit  
395 autophagic cargo receptors, which can be biotinylated by APEX2 during cargo engulfment. (B) 10-plex  
396 TMT APEX2-ATG8 pipeline to capture autophagy receptors during nutrient stress (EBSS + BafA, 4 hours)  
397 with or without active LIR docking sites. At 3 hours post-nutrient stress, cells were supplemented with  
398 biotin phenol (1 hour) and then treated with H<sub>2</sub>O<sub>2</sub> for 1 min followed by quenching (see METHODS). (C,

399 **D)** Plots of  $GABARAPL2^{Y49A/L50A} \text{Log}_2(\text{EBSS+BafA/UT}) - \text{WT} \text{Log}_2(\text{EBSS+BafA/UT})$  versus WT  
400  $\text{Log}_2(\text{EBSS+BafA/UT})$  (panel C) and  $MAP1LC3B^{K51A/G120A} \text{Log}_2(\text{EBSS+BafA/UT}) - \text{WT}$   
401  $\text{Log}_2(\text{EBSS+BafA/UT})$  versus WT  $\text{Log}_2(\text{EBSS+BafA/UT})$  (panel D) where priority for individual proteins  
402 is scaled based on the color code inset. Full plots are shown in **fig. S2E, F.** **(E)** Top ranked proteins (n=30)  
403 based on summed individual rankings for global proteomics and ATG8 proximity biotinylation (see  
404 METHODS) displayed based on their sub-cellular localization, involvement in autophagy, and the presence  
405 of a known or candidate LIR motif. Proteins known to function as autophagic cargo receptors are in bold  
406 font.  
407

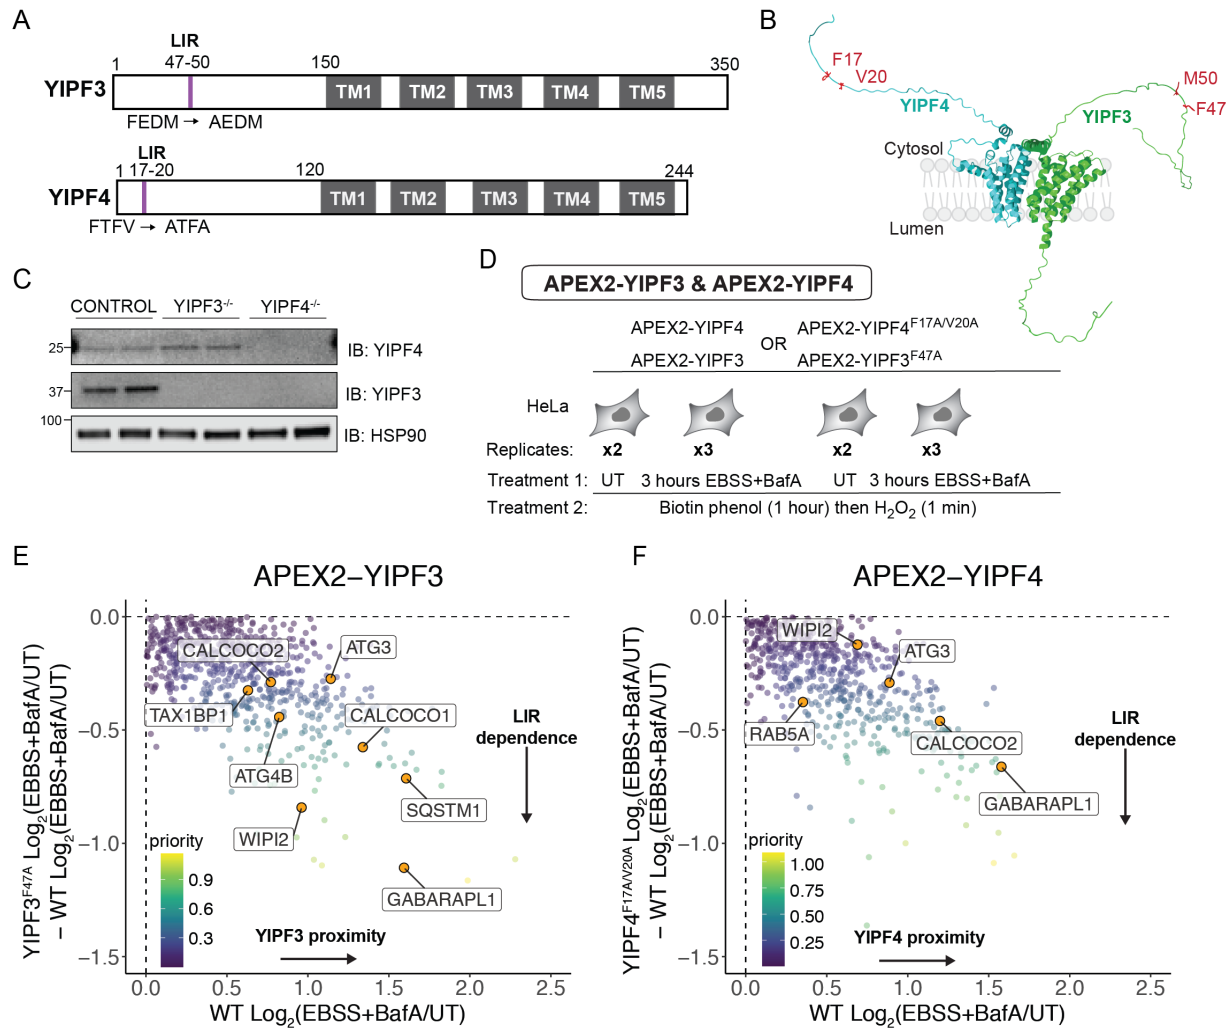

408  
409  
410

411 **Figure 3. LIR-containing YIPF3 and YIPF4 associate with autophagy machinery during nutrient**  
 412 **stress. (A)** Domain structure of YIPF3 and YIPF4 showing the location of the five transmembrane segments  
 413 and N-terminal candidate LIR motifs. **(B)** Model for YIPF3-YIPF4 heterodimer was generated using  
 414 Colabfold. **(C)** Immunoblotting of WT, YIPF3<sup>-/-</sup>, and YIPF4<sup>-/-</sup> HeLa cells probed in duplicate with the  
 415 indicated antibodies. Anti-HSP90 was used as a loading control. **(D)** Experimental scheme for proximity  
 416 biotinylation using APEX2-YIPF3/4 (or LIR mutants) in response to nutrient stress (EBSS, 4 hours). **(E)**  
 417 Plots of YIPF3<sup>F47A</sup> Log<sub>2</sub>(EBSS+BafA/UT) - WT Log<sub>2</sub>(EBSS+BafA/UT) versus WT  
 418 Log<sub>2</sub>(EBSS+BafA/UT) (left) and YIPF4<sup>F17A/V20A</sup> Log<sub>2</sub>(EBSS+BafA/UT) - WT Log<sub>2</sub>(EBSS+BafA/UT)

419 versus WT  $\text{Log}_2(\text{EBSS+BafA/UT})$  (right) where priority for individual proteins is scaled based on the color  
420 code inset. Full plots are shown in **fig. S3E, F**.  
421

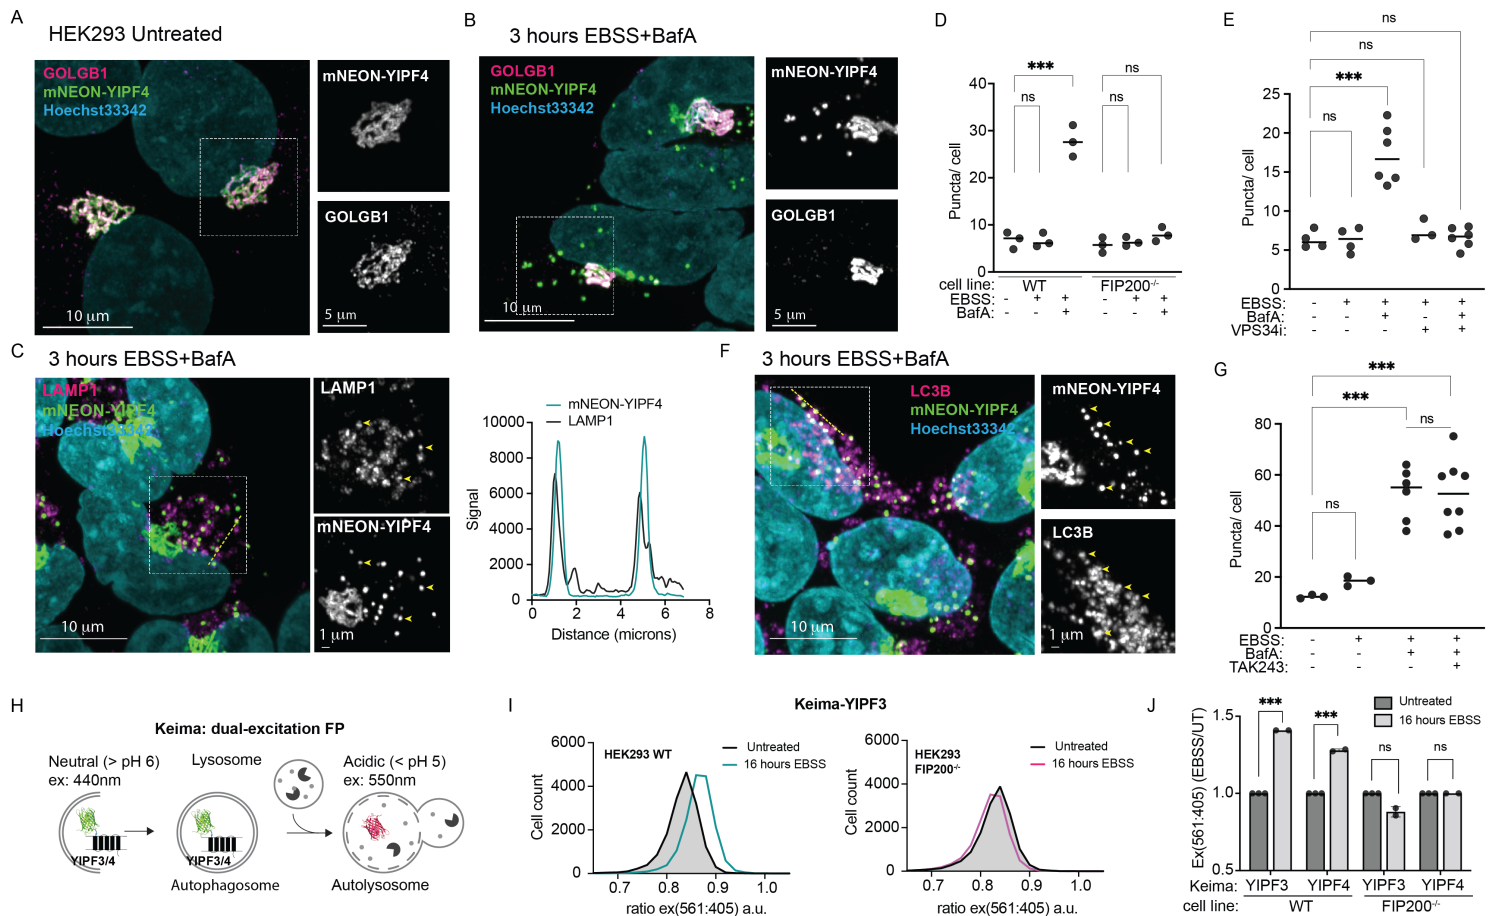

422  
423  
424

425 **Figure 4. Golgi-derived YIPF4-containing vesicles traffic to lysosomes via autophagy.** (A, B) HEK293  
426 cells expressing endogenous YIPF4 tagged on its N-terminus with mNEON (green) by gene editing were  
427 imaged using confocal microscopy and co-stained with the Golgi marker GOLGB1 (magenta). Cells were  
428 either left untreated (panel A) or subjected to nutrient stress (3 hours) (panel B) prior to imaging. Nuclei  
429 were labeled with Hoechst33342 dye (cyan). Scale bars 5 or 10 microns as indicated. (C) Cells treated as  
430 in panel B were immunostained with  $\alpha$ -LAMP1 (magenta). Line scans (right histogram) demonstrate co-  
431 localization of mNEON-YIPF4 puncta and LAMP1-positive structures. Scale bars 1 or 10 microns as  
432 indicated. Yellow arrowheads indicate examples of YIPF4-positive puncta that overlap LAMP1-positive  
433 structures. (D, E) The number of mNEON-YIPF4 puncta/cell is plotted for the indicated treatments in cells  
434 with or without FIP200. Each dot represents one image where the mNEON and nuclei were counted. \*\*\*,

435 Mann-Whitney p-value < 0.05. **(F)** Cells treated as in panel **B** were immunostained with  $\alpha$ -LC3B  
436 (magenta). Yellow arrowheads indicate examples of YIPF4-positive puncta that overlap LC3B-positive  
437 structures. Scale bars 1 or 10 microns as indicated. **(G)** The number of mNEON-YIPF4 puncta/cell is plotted  
438 for the indicated treatments in cells 3 hours post nutrient stress. \*\*\*, Mann-Whitney p-value < 0.05. **(H)**  
439 Scheme outlining Keima-YIPF3/4 as reporters for Golgiphagic flux. **(I)** Keima-YIPF3 expressing HEK293  
440 cells (with or without FIP200) were left untreated or subjected to nutrient stress for 16 hours and then  
441 analyzed by flow cytometry. Frequency distributions of 561/405 nm ex. ratios are shown ( $n = 10,000$  cells  
442 per condition). **(J)** Bargraph of median values of the biological duplicate experiments for 561/405 nm ex.  
443 ratios for Keima-YIPF3 or Keima-YIPF4 with or without FIP200. Error bars represent standard error of the  
444 mean (s.e.m.).  
445  
446

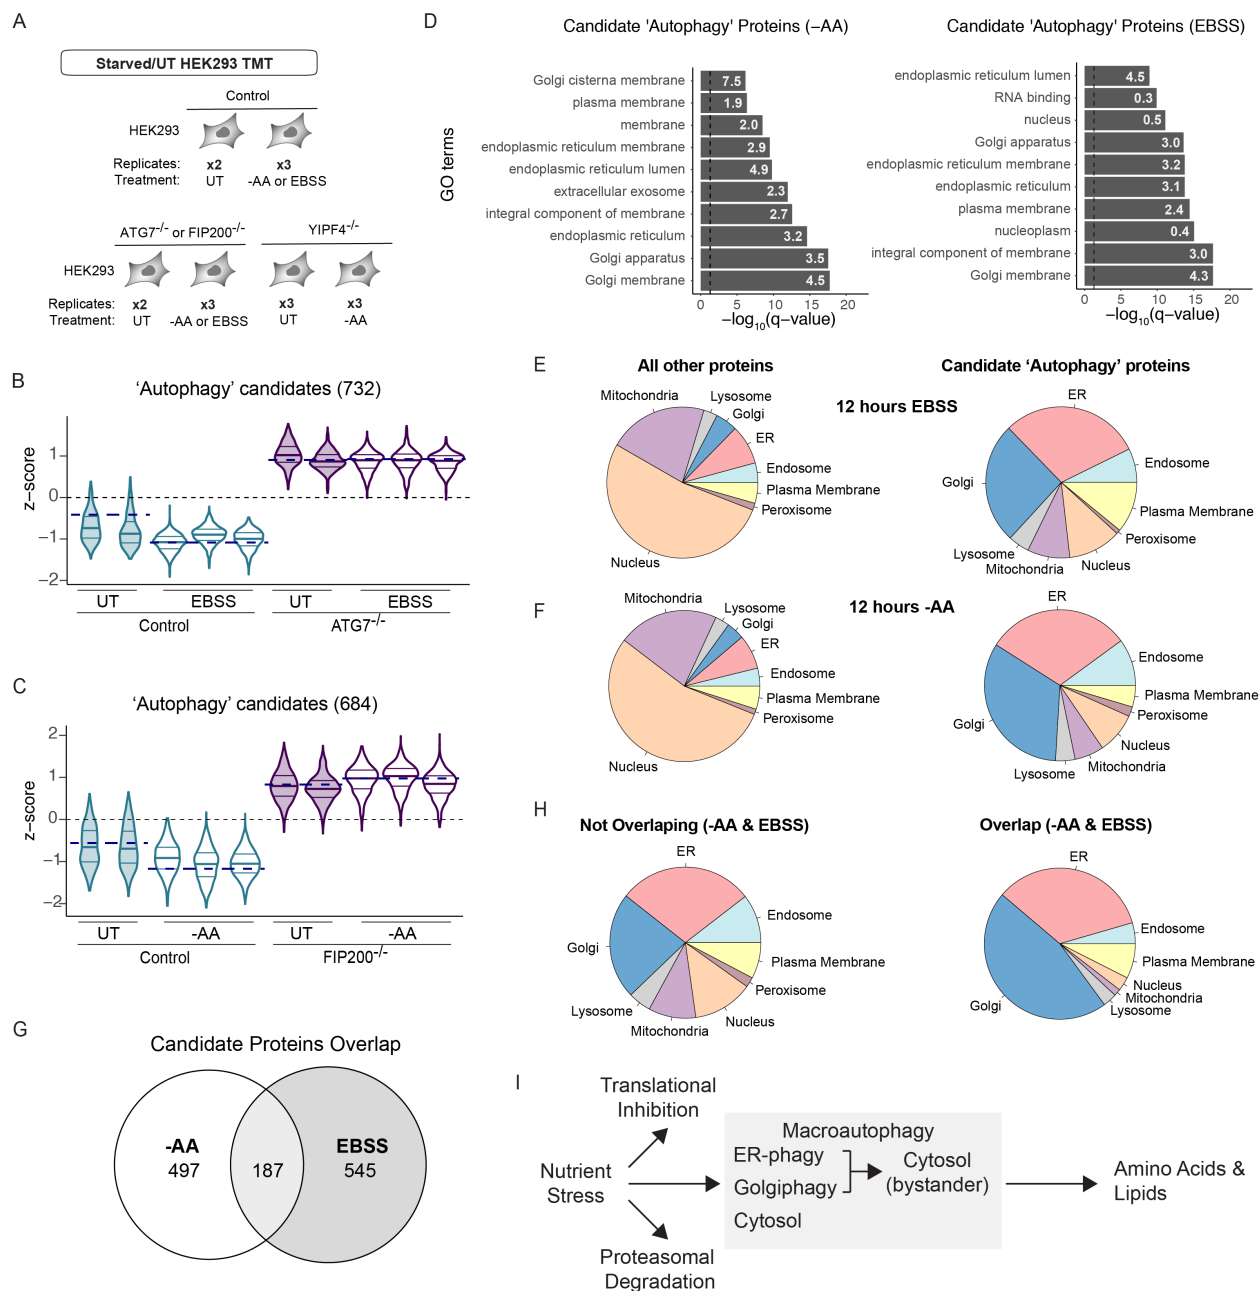

447  
448  
449

450 **Figure 5. Golgi and ER represent major targets for autophagic turnover in response to nutrient**  
 451 **stress. (A)** Scheme depicting method for global proteome alterations via autophagy in response to nutrient  
 452 **stress. (B)** Violin plots for proteins identified as candidate 'autophagy' proteins in WT and ATG7<sup>-/-</sup> HEK293  
 453 **cells with or without EBSS (12 hours). Navy dashed lines indicated median value for known autophagy**  
 454 **proteins in each condition. (C)** Violin plots for proteins identified as candidate 'autophagy' proteins in WT



455 and FIP200<sup>-/-</sup> HEK293 cells with or without AA withdrawal (12 hours). Navy dashed lines indicated median  
456 value for known autophagy proteins in each condition. **(D)** Top 10 Gene Ontology terms identified for  
457 candidate ‘autophagy’ proteins from cells subjected to EBSS treatment (left panel) or AA withdrawal (right  
458 panel). **(E)** Frequency of proteins with the indicated sub-cellular localizations for the candidate ‘autophagy’  
459 proteins or all other proteins for cells subjected to EBSS treatment. **(F)** Frequency of proteins with the  
460 indicated sub-cellular localizations for the candidate ‘autophagy’ proteins or all other proteins for cells  
461 subjected to AA withdrawal. **(G)** Overlap of proteins identified in the candidate ‘autophagy’ proteins from  
462 both types of nutrient stress. **(H)** Frequency of proteins with the indicated sub-cellular localizations for  
463 either overlapping or non-overlapping proteins from panel G. **(I)** Model for how nutrient stress activates a  
464 macroautophagy program wherein ER and Golgi turnover by selective autophagy underlies a major  
465 component of the process. Cytosolic proteins are also degraded but could also be captured non-specifically  
466 as part of the selective autophagy program. See text for details.

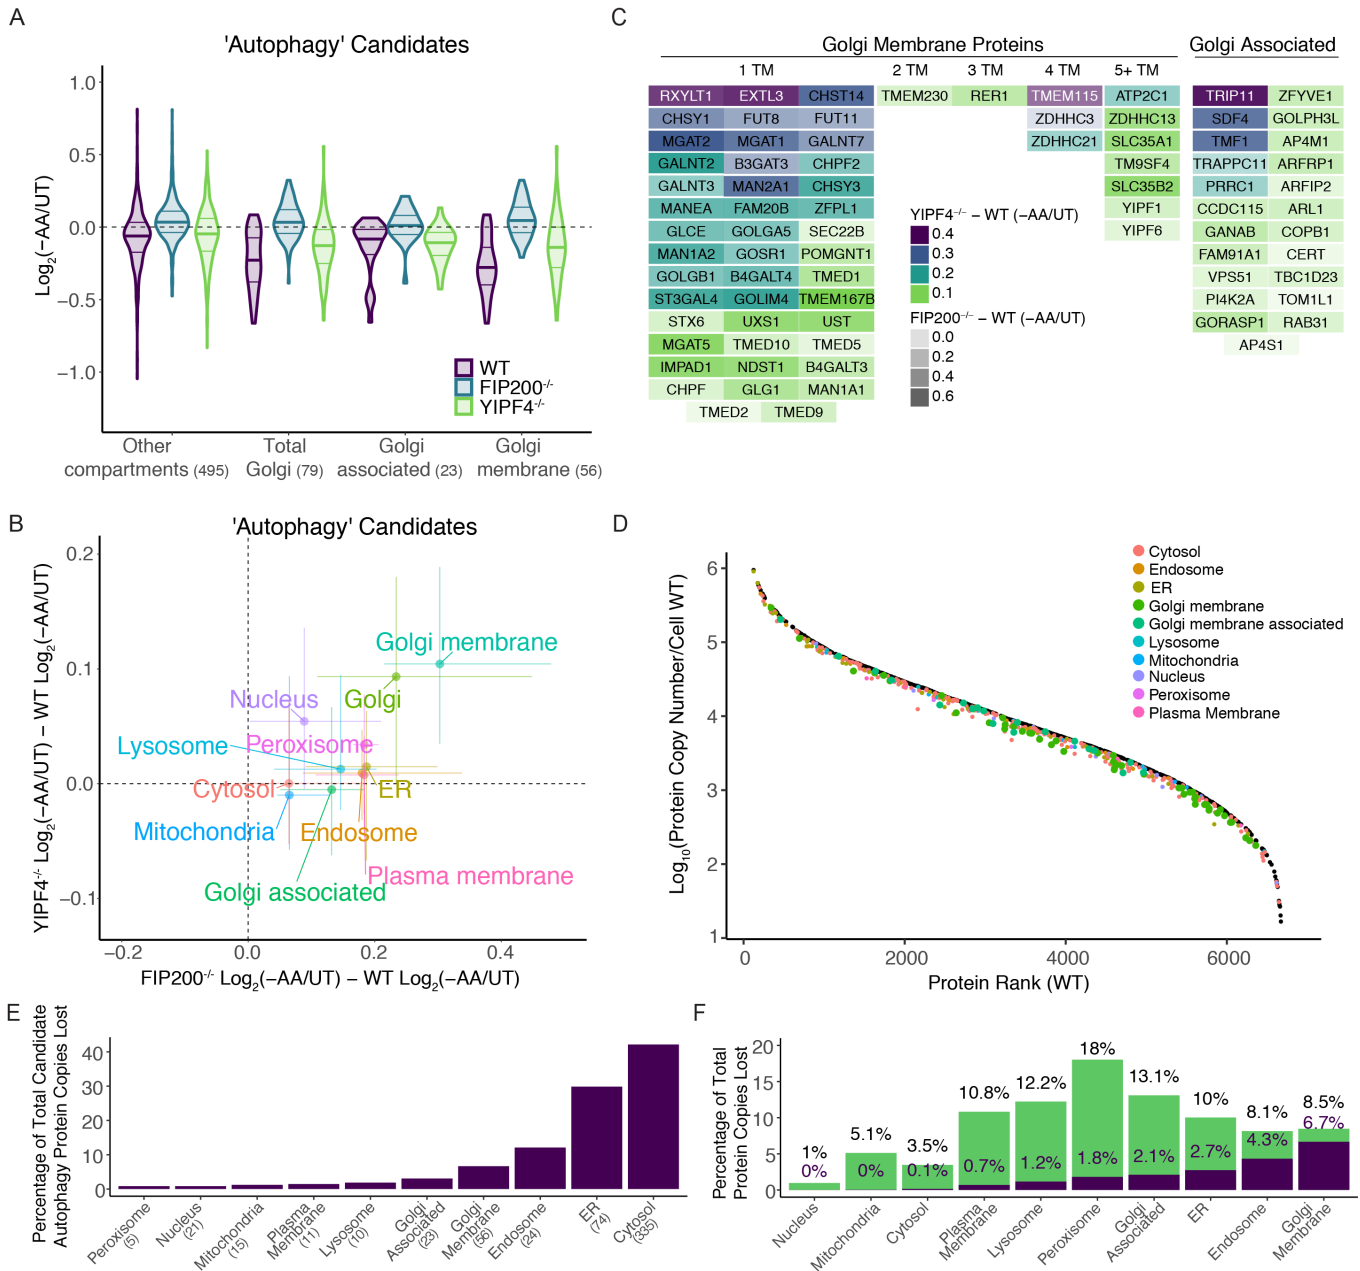

467

468

469 **Figure 6. Protein census for autophagic protein degradation during nutrient stress.** (A) Violin plots

470 for total Golgi, Golgi-associated, Golgi-membrane, and other classes of proteins in WT, FIP200<sup>-/-</sup>, or

471 YIPF4<sup>-/-</sup> HEK293 cells in response to AA withdrawal (12 hours). Median value for the proteins within each

472 group is indicated by the bold solid line. (B) Correlation plot of candidate 'autophagy' proteins for

473 alterations in protein abundance for the indicated sub-cellular compartments during AA withdrawal for

474 YIPF4<sup>-/-</sup>/WT cells (y-axis) versus FIP200<sup>-/-</sup>/WT cells (x-axis). Points are median of each distribution, and  
475 lines represent 25-75% quantile. (C) Classification of Golgi proteins that display YIPF4 or FIP200-  
476 dependent degradation in response to AA withdrawal (12 hours), with the number of trans-membrane  
477 segments for each membrane protein, as well as Golgi-associated proteins, shown. Grey density scale  
478 indicates the FIP200-dependence while the color scale indicates YIPF4-dependence. (D) TMT-scaled MS1  
479 ranked plots. Protein copy number estimates for candidate ‘autophagy’ proteins in HEK293 cells (black) in  
480 rank order. Among the ‘autophagy’ candidate list, the number of protein copies after loss by autophagy  
481 during amino acid starvation for each compartment as determined using protein abundance fold changes  
482 (AA withdrawal – untreated). (E) Among the candidate autophagy proteins, percentage of total protein  
483 copy numbers lost via amino acid withdrawal. (F) Percentage of all protein copies lost from ‘autophagy’  
484 candidate list (purple) or other mechanisms (green) by amino acid withdrawal for subcellular compartments  
485 (1.2829 x 10<sup>6</sup> total).

486

487

488

489 **REFERENCES:**

- 490 1. G. Y. Liu, D. M. Sabatini, mTOR at the nexus of nutrition, growth, ageing and disease. *Nat Rev Mol*  
491 *Cell Biol* **21**, 183-203 (2020).
- 492 2. C. Pohl, I. Dikic, Cellular quality control by the ubiquitin-proteasome system and autophagy.  
493 *Science* **366**, 818-822 (2019).
- 494 3. C. Chang, L. E. Jensen, J. H. Hurley, Autophagosome biogenesis comes out of the black box. *Nat*  
495 *Cell Biol* **23**, 450-456 (2021).
- 496 4. C. A. Lamb, T. Yoshimori, S. A. Tooze, The autophagosome: origins unknown, biogenesis complex.  
497 *Nat Rev Mol Cell Biol* **14**, 759-774 (2013).
- 498 5. H. An *et al.*, TEX264 Is an Endoplasmic Reticulum-Resident ATG8-Interacting Protein Critical for  
499 ER Remodeling during Nutrient Stress. *Mol Cell* **74**, 891-908 e810 (2019).
- 500 6. M. D. Smith *et al.*, CCPG1 Is a Non-canonical Autophagy Cargo Receptor Essential for ER-Phagy  
501 and Pancreatic ER Proteostasis. *Dev Cell* **44**, 217-232 e211 (2018).
- 502 7. H. Chino, T. Hatta, T. Natsume, N. Mizushima, Intrinsically Disordered Protein TEX264 Mediates  
503 ER-phagy. *Mol Cell* **74**, 909-921 e906 (2019).
- 504 8. P. Grumati *et al.*, Full length RTN3 regulates turnover of tubular endoplasmic reticulum via selective  
505 autophagy. *Elife* **6**, (2017).
- 506 9. A. Khaminets *et al.*, Regulation of endoplasmic reticulum turnover by selective autophagy. *Nature*  
507 **522**, 354-358 (2015).
- 508 10. A. Gubas, I. Dikic, ER remodeling via ER-phagy. *Mol Cell* **82**, 1492-1500 (2022).
- 509 11. S. Zellner, C. Behrends, Autophagosome content profiling reveals receptor-specific cargo  
510 candidates. *Autophagy* **17**, 1281-1283 (2021).
- 511 12. J. Mejlvang *et al.*, Starvation induces rapid degradation of selective autophagy receptors by  
512 endosomal microautophagy. *J Cell Biol* **217**, 3640-3655 (2018).
- 513 13. H. An, A. Ordureau, M. Korner, J. A. Paulo, J. W. Harper, Systematic quantitative analysis of  
514 ribosome inventory during nutrient stress. *Nature* **583**, 303-309 (2020).
- 515 14. T. M. Nthiga *et al.*, CALCOCO1 acts with VAMP-associated proteins to mediate ER-phagy. *EMBO*  
516 *J* **39**, e103649 (2020).

- 517 15. T. M. Nthiga *et al.*, Regulation of Golgi turnover by CALCOCO1-mediated selective autophagy. *J*  
518 *Cell Biol* **220**, (2021).
- 519 16. V. Hung *et al.*, Spatially resolved proteomic mapping in living cells with the engineered peroxidase  
520 APEX2. *Nat Protoc* **11**, 456-475 (2016).
- 521 17. L. P. Vaites, J. A. Paulo, E. L. Huttlin, J. W. Harper, Systematic Analysis of Human Cells Lacking  
522 ATG8 Proteins Uncovers Roles for GABARAPs and the CCZ1/MON1 Regulator C18orf8/RMC1 in  
523 Macroautophagic and Selective Autophagic Flux. *Mol Cell Biol* **38**, (2018).
- 524 18. V. V. Eapen, S. Swarup, M. J. Hoyer, J. A. Paulo, J. W. Harper, Quantitative proteomics reveals  
525 the selectivity of ubiquitin-binding autophagy receptors in the turnover of damaged lysosomes by  
526 lysophagy. *Elife* **10**, (2021).
- 527 19. I. Kalvari *et al.*, iLIR: A web resource for prediction of Atg8-family interacting proteins. *Autophagy*  
528 **10**, 913-925 (2014).
- 529 20. K. Tanimoto *et al.*, Characterization of YIPF3 and YIPF4, cis-Golgi Localizing Yip domain family  
530 proteins. *Cell Struct Funct* **36**, 171-185 (2011).
- 531 21. M. Mirdita *et al.*, ColabFold: making protein folding accessible to all. *Nat Methods* **19**, 679-682  
532 (2022).
- 533 22. K. Mochida *et al.*, Super-assembly of ER-phagy receptor Atg40 induces local ER remodeling at  
534 contacts with forming autophagosomal membranes. *Nat Commun* **11**, 3306 (2020).
- 535 23. R. M. Bhaskara *et al.*, Curvature induction and membrane remodeling by FAM134B reticulon  
536 homology domain assist selective ER-phagy. *Nat Commun* **10**, 2370 (2019).
- 537 24. M. L. Hyer *et al.*, A small-molecule inhibitor of the ubiquitin activating enzyme for cancer treatment.  
538 *Nat Med* **24**, 186-193 (2018).
- 539 25. H. Katayama, T. Kogure, N. Mizushima, T. Yoshimori, A. Miyawaki, A sensitive and quantitative  
540 technique for detecting autophagic events based on lysosomal delivery. *Chem Biol* **18**, 1042-1052  
541 (2011).
- 542 26. J. S. Andersen *et al.*, Proteomic characterization of the human centrosome by protein correlation  
543 profiling. *Nature* **426**, 570-574 (2003).

- 544 27. D. N. Itzhak, S. Tyanova, J. Cox, G. H. Borner, Global, quantitative and dynamic mapping of protein  
545 subcellular localization. *Elife* **5**, (2016).
- 546 28. J. R. Wisniewski, M. Y. Hein, J. Cox, M. Mann, A "proteomic ruler" for protein copy number and  
547 concentration estimation without spike-in standards. *Mol Cell Proteomics* **13**, 3497-3506 (2014).
- 548 29. F. A. Ran *et al.*, Genome engineering using the CRISPR-Cas9 system. *Nat Protoc* **8**, 2281-2308  
549 (2013).
- 550 30. J. Navarrete-Perea, Q. Yu, S. P. Gygi, J. A. Paulo, Streamlined Tandem Mass Tag (SL-TMT)  
551 Protocol: An Efficient Strategy for Quantitative (Phospho)proteome Profiling Using Tandem Mass  
552 Tag-Synchronous Precursor Selection-MS3. *J Proteome Res* **17**, 2226-2236 (2018).
- 553 31. J. A. Paulo *et al.*, Quantitative mass spectrometry-based multiplexing compares the abundance of  
554 5000 *S. cerevisiae* proteins across 10 carbon sources. *J Proteomics* **148**, 85-93 (2016).
- 555 32. G. C. McAlister *et al.*, MultiNotch MS3 enables accurate, sensitive, and multiplexed detection of  
556 differential expression across cancer cell line proteomes. *Anal Chem* **86**, 7150-7158 (2014).
- 557 33. B. K. Erickson *et al.*, Active Instrument Engagement Combined with a Real-Time Database Search  
558 for Improved Performance of Sample Multiplexing Workflows. *J Proteome Res* **18**, 1299-1306  
559 (2019).
- 560 34. D. K. Schweppe *et al.*, Full-Featured, Real-Time Database Searching Platform Enables Fast and  
561 Accurate Multiplexed Quantitative Proteomics. *J Proteome Res*, (2020).
- 562 35. D. K. Schweppe *et al.*, Characterization and Optimization of Multiplexed Quantitative Analyses  
563 Using High-Field Asymmetric-Waveform Ion Mobility Mass Spectrometry. *Anal Chem* **91**, 4010-  
564 4016 (2019).
- 565 36. R. Rad *et al.*, Improved Monoisotopic Mass Estimation for Deeper Proteome Coverage. *J Proteome*  
566 *Res* **20**, 591-598 (2021).
- 567 37. E. L. Huttlin *et al.*, A tissue-specific atlas of mouse protein phosphorylation and expression. *Cell*  
568 **143**, 1174-1189 (2010).
- 569 38. J. K. Eng, T. A. Jahan, M. R. Hoopmann, Comet: an open-source MS/MS sequence database  
570 search tool. *Proteomics* **13**, 22-24 (2013).

- 571 39. M. M. Savitski, M. Wilhelm, H. Hahne, B. Kuster, M. Bantscheff, A Scalable Approach for Protein  
572 False Discovery Rate Estimation in Large Proteomic Data Sets. *Mol Cell Proteomics* **14**, 2394-  
573 2404 (2015).
- 574 40. D. L. Plubell *et al.*, Extended Multiplexing of Tandem Mass Tags (TMT) Labeling Reveals Age and  
575 High Fat Diet Specific Proteome Changes in Mouse Epididymal Adipose Tissue. *Mol Cell*  
576 *Proteomics* **16**, 873-890 (2017).
- 577 41. M. C. Chambers *et al.*, A cross-platform toolkit for mass spectrometry and proteomics. *Nat*  
578 *Biotechnol* **30**, 918-920 (2012).
- 579 42. V. Demichev, C. B. Messner, S. I. Vernardis, K. S. Lilley, M. Ralser, DIA-NN: neural networks and  
580 interference correction enable deep proteome coverage in high throughput. *Nat Methods* **17**, 41-  
581 44 (2020).
- 582 43. A. Ordureau *et al.*, Temporal proteomics during neurogenesis reveals large-scale proteome and  
583 organelle remodeling via selective autophagy. *Mol Cell*, (2021).
- 584 44. A. Brenes, J. Hukelmann, D. Bensaddek, A. I. Lamond, Multibatch TMT Reveals False Positives,  
585 Batch Effects and Missing Values. *Mol Cell Proteomics* **18**, 1967-1980 (2019).
- 586
- 587
- 588

589 **ACKNOWLEDGMENTS:**

590 We thank members of the Harper lab for feedback. We acknowledge the Nikon Imaging Center (Harvard  
591 Medical School) for imaging assistance.

592 **Funding:**

593 This work was supported by Aligning Science Across Parkinson's (ASAP) (JWH.).

594 NIH R01 NS110395 (JWH)

595 NIH R01 AG011085 (JWH)

596 NIH R01GM132129 (JAP)

597 Merck-Helen Hay Whitney Foundation (KLH)

598 Michael J Fox Foundation administers the grant ASAP-000282 on behalf of ASAP and itself.

599 For the purpose of open access, the author has applied for a CC-BY public copyright license to the Author  
600 Accepted Manuscript (AAM) version arising from this submission.

601 **Author Contributions:**

602 Conceptualization: SS, KLH, JWH

603 Investigation: SS, KLH, IRS, JCP, JAP

604 Analysis: KLH, IRS, SS

605 CARGO website creation: IRS

606 Visualization: KLH, IRS

607 Writing—original draft: KLH, JWH

608 Writing—reviewing and editing: KLH, SS, IRS, JCP, JAP, JWH

609 **Competing Interests:**

610 J.W.H. is a founder and consultant for Caraway Therapeutics and a co-founding board member of Interline  
611 Therapeutics. All other authors have no competing interests to declare.

612 **Data and materials availability:**



613 All the mass spectrometry proteomics data (155 .RAW files) have been deposited to the ProteomeXchange  
614 Consortium via the PRIDE repository (<http://www.proteomexchange.org/>): (Project Accession:  
615 PXD038358). All analyzed proteomic data are in Data S1, S2, S4, S5, S6, S7, and S8.

#### 616 **Code and Software Availability**

617 Code and data analysis to generate paper figures can be found on GitHub at  
618 <https://github.com/harperlaboratory/Golghiphagy.git>. All data and data figures can be explored using  
619 CARGO (Cellular Autophagy Regulation and GOLgiphagy). CARGO is a ShinyApp interface generated in  
620 R and RStudio that can be accessed at  
621 [https://harperlab.connect.hms.harvard.edu/CARGO\\_CellularAutophagyRegulationandGOLgiphagy/](https://harperlab.connect.hms.harvard.edu/CARGO_CellularAutophagyRegulationandGOLgiphagy/).

622

623

624

625

626

## 627 **MATERIALS AND METHODS:**

### 628 **Reagents:**

629 *Antibodies:* ATG7 (Cell Signaling Technology, 8558S), LC3B (MBL international, M186-3), ULK1 (Cell  
630 Signaling Technology 8054), Phospho-ULK1 (ser757) (Cell Signaling Technology 14202), 4E-BP1 (Cell  
631 Signaling Technology 9644), Phospho-4E-BP1 (Thr37/46) (Cell Signaling Technology 2855), TEX264  
632 (Sigma, HPA017739), Tubulin (Abcam, ab7291), 4EBP1 (Cell Signal Technology, 9644), YIPF3  
633 (Invitrogen PA566621), YIPF4 (Sino Biological 202844-T46), HSP90 (Proteintech 60318), CALCOCO1  
634 (Abclonal A7987), LAMP1 (Cell Signaling Technology 9091), GOLGB1/ Giantin (abcam ab37266),  
635 GOLGA2 (Proteintech 11308), PCNA (Santa Cruz PC10), IRDye 800CW Goat anti-Rabbit IgG H+L (LI-  
636 COR, 925-32211), IRDye 680 RD Goat anti-Mouse IgG H+L (LI-COR, 926-680),

637 *Chemicals, Peptides, and Recombinant Proteins:* FluoroBrite DMEM (Thermo Fisher Scientific A,  
638 1896701), Benzonase Nuclease HC (Millipore, 71205-3), Urea (Sigma, Cat#U5378), SDS (Sodium  
639 Dodecyl Sulfate) (Bio-Rad, Cat#1610302), Dulbecco's MEM (DMEM), high glucose, pyruvate (Gibco /  
640 Invitrogen, 11995), Dulbecco's MEM (DMEM), Low Glucose, w/o Amino Acids (US Biological, D9800-  
641 13), TCEP (Gold Biotechnology), Puromycin (Gold Biotechnology, P-600-100), Protease inhibitor cocktail  
642 (Sigma-Aldrich, P8340), PhosSTOP (Sigma-Aldrich, 4906845001), Trypsin (Promega, V511C), Lys-C  
643 (Wako Chemicals, 129-02541), EPPS (Sigma-Aldrich, Cat#E9502), 2-Chloroacetamide (Sigma-Aldrich,  
644 C0267), TMT 11plex Label Reagent (Thermo Fisher Scientific, Cat#90406 & #A34807), TMTpro 16plex  
645 Label Reagent (Thermo Fisher Scientific, Cat#A44520), Hydroxylamine solution (Sigma Cat#438227),  
646 Empore™ SPE Disks C18 (3M - Sigma-Aldrich Cat#66883-U), Sep-Pak C18 Cartridge (Waters  
647 Cat#WAT054960 and #WAT054925), SOLA HRP SPE Cartridge, 10 mg (Thermo Fisher Scientific,  
648 Cat#60109-001), High pH Reversed-Phase Peptide Fractionation Kit (Thermo Fisher Scientific,  
649 Cat#84868), Bio-Rad Protein Assay Dye Reagent Concentrate (Bio-Rad,#5000006), and EBSS (Sigma-  
650 Aldrich Cat#E3024).

651

### 652 **Cell lines:**

653 HEK293 (human embryonic kidney, fetus, ATCC CRL-1573, RRID: CVCL\_0045), and HeLa (cervical  
654 carcinoma cell line CCL-2; RRID: CVCL\_0030) cells were grown in Dulbecco's modified Eagle's medium  
655 (DMEM, high glucose and pyruvate) supplemented with 10% fetal calf serum and maintained in a 5% CO<sub>2</sub>  
656 incubator at 37°C. Cells were maintained at <80% confluency throughout the course of experiments. HeLa  
657 cells lacking MAP1LC3B or GABARAPL2 were from a previous study (17).

658

### 659 **Nutrient starvation experiments:**

660 Cells were plated in 6-well, 10cm or 15cm dishes the night before nutrient stress. DMEM was removed and  
661 cells were washed 3 times with DPBS followed by resuspending cells in EBSS or DMEM lacking amino  
662 acids prepared according to (5). For whole cell proteomics experiments, cells were resuspended in EBSS  
663 or media lacking amino acids as described in (7) for 12-18. For APEX2 proximity labeling and imaging  
664 experiments, cells were resuspended in EBSS+ BafA for 3-4 hours in the presence or absence of indicated  
665 inhibitors.

666

### 667 **CRISPR-Cas9 gene editing:**

668 *YIPF4, FIP200, ATG7* knock-out in HEK293, and *ATG7, YIPF4, CALCOCO1* knock-out in HeLa cell lines  
669 were carried out by plasmid-based transfection of Cas9/gRNA using pX459 plasmid as described (29). The  
670 following gRNAs, designed using the CHOPCHOP website (<http://chopchop.cbu.uib.no/>), were used:  
671 YIPF4: 5' ATCTCGCGGCGACTCCCAAC / CGGCCTATGCCCCCACTAAC 3'; FIP200: 5'  
672 ACTACGATTGACACTAAAGA 3'; ATG7 HEK293: 5' ATCCAAGGCACTACTAAAAG 3';  
673 CALCOCO1: 5' AAGTTGACTCCACCACGGGA / CTAAGCCGGGCACCATCCCCG 3'. Puromycin  
674 selection was followed 24-48 hours after the transfection. Cells were given a day to recover from puromycin  
675 selection and then single cells were sorted into a 96-well plate using fluorescence-activated cell sorting  
676 (FACS) on the SONY SH800S sorter. Individual clones were screened for deletion of the relevant gene by  
677 immunoblotting cell extracts with antibodies specific for the designed gene product. For amino-terminal

678 tagging of the YIPF4 locus, the gRNA 5' TCGCCGCGAGATGCAGCCTC 3' was cloned into pX459 and  
679 co-transfected with a repair template containing an mNEON Green cassette flanked by homology arms  
680 (pSMART-mNEON-YIPF4) into HEK293 and HEK293 FIP200<sup>-/-</sup> cells using lipofectamine 3000. After 7  
681 days, a population of cells for both genotypes was sorted for the same level of mNEON Green signal.

682

#### 683 **Cell lysis and immunoblotting assay:**

684 Cells were cultured in the presence of the corresponding stress to 60-80% confluency in 6-well plates, 10  
685 cm or 15 cm dishes. After removing the media, the cells were washed with DPBS three times. To lyse cell  
686 urea buffer (8M urea, 50 mM TRIS 7.5, 150 mM NaCl, containing mammalian protease inhibitor cocktail  
687 (Sigma), Phos-STOP, and 20 unit/ml Benzoylase (Millipore)) was added directly onto the cells. Cell lysates  
688 were collected by cell scrapers and sonicated on ice for 10 seconds at level 5, and lysates were cleared by  
689 centrifugation (15000 rpm, 10 min at 4 °C). The concentration of the supernatant was measured by BCA  
690 assay. For immunoblotting, the whole cell lysate was denatured by the addition of LDS sample buffer  
691 supplemented with 100 mM DTT, followed by boiling at 95°C for 5 minutes. 10-20 µg of each lysate was  
692 loaded onto the 4-20% Tris-Glycine gel (Thermo Fisher Scientific) or 4-12% NuPAGE Bis-Tris gel  
693 (Thermo Fisher Scientific), followed by SDS-PAGE with Tris-Glycine SDS running buffer (Thermo Fisher  
694 Scientific) or MOPS SDS running buffer (Thermo Fisher Scientific), respectively. *For Chemiluminescence*  
695 *westerns:* The proteins were electro-transferred to PVDF membranes (0.45 µm, Millipore), and then the  
696 total protein was stained using Ponceau (Thermo Fisher Scientific). The membrane was then blocked with  
697 5% non-fat milk (r.t., 60 min) incubated with the indicated primary antibodies (4°C, overnight), washed  
698 three times with TBST (total 30 min), and further incubated either with HRP conjugated anti-Rabbit and  
699 anti-mouse secondaries at (1:5,000) for 1 hour. After thorough wash with TBST for 30 min membranes  
700 were treated with Lightning™ Plus Chemiluminescence Reagent (PerkinElmer, NEL104001EA) after  
701 mixing the Enhanced Luminol Reagent and the Oxidizing Reagent 1:1. Mixed Chemiluminescence Reagent  
702 was added to blot and rocked gently for 1 minute and imaged using BioRad ChemiDoc Imaging System.  
703 *For LI-COR westerns:* The proteins were electro-transferred to nitrocellulose membranes and then the total  
704 protein was stained using Ponceau (Thermo Fisher Scientific). The membrane was then blocked with LI-  
705 COR blocking buffer at room temperature for 1 hour. Then membranes were incubated with the indicated  
706 primary antibodies (4°C, overnight), washed three times with TBST (total 30 min), and further incubated  
707 either with fluorescent IRDye 680RD Goat anti-Mouse IgG H+L, or IRDye 800CW Goat anti-Rabbit IgG  
708 H+L secondary antibody at (1:10,000) at room temperature for 1 hour. After thorough wash with TBST for  
709 30 min, near infrared signal was detected using OdysseyCLx imager and quantified using ImageStudioLite  
710 (LI-COR).

711

#### 712 **Flow Cytometry for Keima analysis:**

713 Corresponding cells were plated onto 96-well plates one day prior to the nutrient stress. The cells were  
714 washed twice with PBS and resuspended in DMEM or EBSS to start 16-hour starvation. After starvation,  
715 cells were treated with trypsin and quenched with Phenol red free-DMEM. Cells were filtered and analyzed  
716 by flow-cytometry (Attune NxT, Thermo Fisher) using the high throughput autosampler (CyKick). The  
717 data was processed by FlowJo software and plotted using GraphPad Prism.

718

#### 719 **Confocal Microscopy:**

720 Cells were plated onto 18 or 22 mm-glass coverslips (No. 1.5, 22x22 mm glass diameter, VWR 48366-227)  
721 the day before nutrient stress. DMEM was removed and cells were washed three times with DPBS, followed  
722 by resuspension in EBSS + the appropriate inhibitor(s) (SAR405, BafA, TAK243). After starvation  
723 treatment, cells were fixed using 4% PFA followed by permeabilization with 0.5% Triton-X100. Cells were  
724 blocked in 3% BSA for 30 minutes, followed by incubation in primary antibodies for 1 hour at room  
725 temperature. Cells were washed 3 times with DPBS + 0.02% tween-20, followed by incubation in secondary  
726 (alexafluor conjugated secondary antibodies) for 1 hour at room temperature. Coverslips were then washed  
727 3 times with DPBS + 0.02% tween-20 and mounted onto glass slides using mounting media (Vectashield  
728 H-1000) and sealed with nail polish. The cells were imaged using a Yokogawa CSU-W1 spinning disk

729 confocal on a Nikon Ti motorized microscope equipped with a Nikon Plan Apo 100x/1.40 N.A objective  
730 lens, and Hamamatsu ORCA-Fusion BT CMOS camera. For the analysis, the equal gamma, brightness, and  
731 contrast were applied for each image using FiJi software. For quantification, at least 3 separate images were  
732 quantified for the number of mNEON puncta and nuclei.

733

#### 734 **Proteomics Workflow:**

735 *TMT total proteome sample preparation.* Cells were cultured to 70% confluency and washed with PBS  
736 three times. Cells were lysed by in UREA denaturing buffer (8M Urea, 150mM NaCl, 50mM EPPS pH8.0,  
737 containing mammalian protease inhibitor cocktail (Sigma), and Phos-STOP) Cell lysates were collected by  
738 cell scrapers and sonicated on ice for 10 seconds at level 5, and resultant extracts were clarified by  
739 centrifugation for 10 minutes at 15,000xg at 4 °C. Lysates were quantified by BCA and ~50 µg of protein  
740 was reduced with TCEP (10mM final concentration for 30 min) and alkylated with Chloroacetamide  
741 (20mM final concentration) for 30 minutes. Proteins were chloroform-methanol precipitated using the  
742 protocol in SL-TMT protocol (30), reconstituted in 200 mM EPPS (pH 8.5), digested by Lys-C for 2 hours  
743 at 37 degrees (1:200 w:w LysC:protein) and then by trypsin overnight at 37°C (1:100 w:w trypsin:protein).  
744 ~25µg of protein was labeled with 62.5 µg of TMT or TMTpro for 120 min at room temperature. After  
745 labeling efficiency check, samples were quenched with hydroxylamine solution at ~0.3% final (w. in water),  
746 pooled, and desalted C18 solid-phase extraction (SPE) (SepPak, Waters). Pooled samples were offline  
747 fractionated with basic reverse phase liquid chromatography (bRP-LC) into a 96-well plate and combined  
748 for a total of 24 fractions (31) before desalting using a C18 StageTip (packed with Empore C18; 3M  
749 Corporation) , and subsequent LC-MS/MS analysis.

750 *DIA total proteome sample preparation:* HEK293 cells (with or without amino acid withdrawal treatment)  
751 were cultured to ~70% confluency, washed twice with chilled PBS, and harvested by cell scraping in PBS.  
752 Following centrifugation at 4°C, cell pellets were lysed in a denaturation buffer (8M Urea, 150mM NaCl,  
753 50mM EPPS pH8.0, containing mammalian protease inhibitor cocktail (Sigma), and Phos-STOP) by  
754 sonication (three times at level 5 for 5 seconds, with rest on ice). Cell extracts were clarified by  
755 centrifugation for 10 minutes at 15,000xg at 4°C. Lysates were quantified by BCA and protein was reduced  
756 with TCEP (5 mM final concentration for 30 min), alkylated with IAA (10 mM final concentration) in the  
757 dark for 30 minutes, and quenched with DTT (5 mM final concentration) for 30 minutes. 100 ug of protein  
758 was methanol-chloroform precipitated using the protocol in SL-TMT protocol (30), reconstituted in 100  
759 mM EPPS (pH 8.5 at 1 mg/mL), digested by Lys-C for 2 hours at 37°C (1:100 w:w LysC:protein) and then  
760 by trypsin overnight at 37°C (1:100 w:w trypsin:protein). 30 ug of protein digests were acidified with  
761 formic acid to pH ~3-3.5, desalted using a C18 StageTip (packed 200ul pipette tip with Empore C18; 3M  
762 Corporation), and subjected to data independent acquisition (DIA) LC-MS/MS analysis.

763 *Sample preparation for Mass Spectrometry-APEX2 Proteomics.* For APEX2 proteomics, cells expressing  
764 various APEX2 fusions were processed as in (18). To induce proximity labeling in live cells, cells were  
765 incubated with 500 µM biotin phenol (LS-3500.0250, Iris Biotech) for 1 hr and treated with 1 mM H<sub>2</sub>O<sub>2</sub> for  
766 1 min, and the reaction was quenched with three washes of 1× PBS supplemented with 5 mM Trolox, 10  
767 mM sodium ascorbate and 10 mM sodium azide. Cells were then harvested and lysed in  
768 radioimmunoprecipitation assay (RIPA) buffer. To enrich biotinylated proteins, ~2mg of cleared lysates  
769 was subjected to affinity purification by incubating with the streptavidin-coated agarose beads (catalog no.  
770 88817, Pierce) for 1.5 hours at room temperature. Beads were subsequently washed twice with RIPA buffer,  
771 once with 1 M KCl, once with 0.1 M NaCO<sub>3</sub>, once with PBS and once with water. For proteomics,  
772 biotinylated protein bound to the beads were reduced using TCEP (10mM final concentration) in EPPS  
773 buffer at room temperature for 30 minutes. After reduction, samples were alkylated with the addition of  
774 Chloroacetamide (20mM final concentration) for 20 minutes. Beads were washed three times with water.  
775 Proteins bound to beads were then digested with LysC (0.5µl) in 100ul of 0.1M EPPS (pH 8.5) for 2 hours  
776 at 37°C, followed by trypsin overnight at 37°C (1µl). To quantify the relative abundance of individual  
777 protein across different samples, each digest was labeled with 62.5 µg of TMT11 or TMT16pro reagents  
778 for 2 hours at room temperature (Thermo Fisher Scientific), mixed, and desalted with a C18 StageTip

779 (packed with Empore C18; 3M Corporation) before SPS-MS<sup>3</sup> analysis on an Orbitrap Fusion Lumos Tribrid  
780 Mass Spectrometer (Thermo Fisher Scientific) coupled to a Proxeon EASY-nLC1200 liquid  
781 chromatography (LC) pump (Thermo Fisher Scientific). Peptides were separated on a 100 µm inner  
782 diameter microcapillary column packed with ~35 cm of Accucore150 resin (2.6 µm, 150 Å, ThermoFisher  
783 Scientific, San Jose, CA) with a gradient consisting of 5%–21% (ACN, 0.1% FA) over a total 150 min run  
784 at ~500 nL/min (32). Details of instrument parameters for each experiment are provided below.

785 *TMT Data acquisition.* Samples were analyzed on Orbitrap Fusion Lumos Tribrid Mass Spectrometer  
786 coupled to a Proxeon EASY-nLC 1200 pump (ThermoFisher Scientific). Peptides were separated on a 35  
787 cm column packed using a 95 to 110 min gradient. MS<sup>1</sup> data were collected using the Orbitrap (120,000  
788 resolution). MS<sup>2</sup> scans were performed in the ion trap with CID fragmentation (isolation window 0.7 Da;  
789 rapid scan; NCE 35%). Each analysis used the Multi-Notch MS<sup>3</sup>-based TMT method (32), to reduce ion  
790 interference compared to MS<sup>2</sup> quantification, combined in some instance with newly implemented Real  
791 Time Search analysis (33, 34), and with the FAIMS Pro Interface (using previously optimized 3 CV  
792 parameters (-40, -60, -80) for TMT multiplexed samples (35)). MS<sup>3</sup> scans were collected in the Orbitrap  
793 using a resolution of 50,000, NCE of 65 (TMT) or 45 (TMTpro). The closeout was set at two peptides per  
794 protein per fraction, so that MS<sup>3</sup> scans were no longer collected for proteins having two peptide-spectrum  
795 matches (PSMs) that passed quality filters.

796 *DIA data acquisition:* Samples were analyzed on an Orbitrap Exploris 480 Mass Spectrometer coupled  
797 to a Proxeon EASY-nLC pump 1000 (ThermoFisher Scientific). Peptides were separated on a 15 cm  
798 column packed with Accucore150 resin (150 Å, 2.6mm C18 beads Thermo Fisher Scientific, San Jose, CA)  
799 using an 80 min acetonitrile gradient. MS<sup>1</sup> data were collected using the Orbitrap (60,000 resolution, 350-  
800 1,050 m/z, 100% Normalized AGC, maxIT set to “auto”). DIA MS<sup>2</sup> scans in the Orbitrap were performed  
801 overlapping 24 m/z windows for first duty cycle (390-1,014 m/z) and for second duty cycle (402-1,026  
802 m/z) with 28% NCE, 30,000 resolution, for fixed 145-1,450 m/z range, 1,000% normalized AGC, and 54  
803 ms maxIT MS<sup>1</sup> survey scan was performed following each DIA MS/MS duty cycle.

804 *TMT Data analysis.* Mass spectra were converted to mzXML and monoisotopic peaks were reassigned with  
805 Monocle (36) and then database searched using a Sequest-based (37, 38) or Sequest-HT using Proteome  
806 Discoverer (v2.3.0.420 – Thermo Fisher Scientific). Database searching included all canonical entries from  
807 the Human reference proteome database (UniProt Swiss-Prot – 2019-01;  
808 [https://ftp.uniprot.org/pub/databases/uniprot/previous\\_major\\_releases/release-2019\\_01/](https://ftp.uniprot.org/pub/databases/uniprot/previous_major_releases/release-2019_01/)) and sequences of  
809 common contaminant proteins. Searches were performed using a 20 ppm precursor ion tolerance, and a 0.6  
810 Da product ion tolerance for ion trap MS/MS were used. TMT tags on lysine residues and peptide N termini  
811 (+229.163 Da for Amino-TMT or +304.207 Da for TMTpro) and carbamidomethylation of cysteine  
812 residues (+57.021 Da) were set as static modifications, while oxidation of methionine residues (+15.995  
813 Da) was set as a variable modification. PSMs were filtered to a 2% false discovery rate (FDR) using linear  
814 discriminant analysis as described previously (37) using the Picked FDR method (39), proteins were filtered  
815 to the target 2% FDR level. For reporter ion quantification, a 0.003 Da window around the theoretical m/z  
816 of each reporter ion was scanned, and the most intense m/z was used. Peptides were filtered to include only  
817 those peptides with >200 summed signal-to-noise ratio across all TMT channels. An isolation purity of at  
818 least 0.5 (50%) in the MS1 isolation window was used for samples analyzed without online real-time  
819 searching. For each protein, the filtered peptide-spectral match TMT or TMTpro raw intensities were  
820 summed and log<sub>2</sub> normalized to create protein quantification values (weighted average). Using protein TMT  
821 quantifications, TMT channels were normalized to the summed (protein abundance experiments) (40) or  
822 median (proximity labeling experiments) (16) TMT intensities for each TMT channel (adjusted to the  
823 median of the TMT channels summarization).

824 *DIA data analysis:* Mass spectra were converted to mzML using msconvert (41) with demultiplexing  
825 (Overlap Only at 10 ppm mass error). mzML files were processed with DIA-NN (42) using UniProt entries  
826 (UP000005640 [9606]). For DIA-NN, we used the following parameters: trypsin specificity ([RK]/P), N-  
827 term methionine excision enabled, fixed modification of carbamidomethylation on cysteines, in library-free  
828 mode, deep learning-based spectra and RTs enabled, MBR enabled, precursor FDR 1% filter, and  
829 quantification with Robust LC (high precision). Using the report.pg\_matrix.tsv output from DIA-NN, we

830 calculated the mean intensity across replicates for untreated and amino acid withdraw treatment conditions  
831 (n=4 each) based on replicate intensities (observed in at least two biological replicates) which were used to  
832 estimate a protein copy number per cell using the Proteome Ruler method (28).

833

#### 834 **Statistics:**

835 Normalized log<sub>2</sub> protein reporter ion intensities were compared using a Student's t-test and resultant p-  
836 values were corrected using the Benjamini-Hochberg adjustment (Benjamini and Hochberg 1995). Volcano  
837 plots and other data visualizations were generated in R using resulting q-values and mean fold changes.  
838 Annotations for subcellular lists were derived from (27) and designations from (43). Additional cytosol  
839 protein and Golgi transmembrane number annotations were derived from Uniprot. GO annotations from  
840 Uniprot were appended to MS data to perform Fisher's Exact tests to identify GO enrichment terms  
841 (corrected by Benjamini-Hochberg adjustment). Proteome ruler values were estimated using previously  
842 described methods (28, 44). The proportional contribution of the untreated WT TMT channels to the MS1  
843 precursor are  $(TMT^{WT/UT} / TMT^{All} * MS1^{Area})$  was summed to the protein-level for its constituent peptides.  
844 Resultant protein values were then used to calculate a TMT-based proteome ruler protein absolute  
845 abundance estimate. For imaging quantification, a Mann-Whitney p-value was calculated using GraphPad  
846 Prism9. P-values <0.05 were considered significant unless otherwise noted. Compartment protein copy  
847 number rank tests were performed using a Wilcoxon test to calculate p-value. All data figures were  
848 generated in Adobe Illustrator, using R (4.1.3), Rstudio IDE(2021.09.3 Build 396, Posit), and GraphPad  
849 Prism9.

850

#### 851 **RMSE calculation:**

852 To generate our candidate 'autophagy' protein list, we used known autophagy fluxers in autophagy  
853 proficient (WT) or deficient (ATG7<sup>-/-</sup> or FIP200<sup>-/-</sup>) cells. For each known autophagy fluxer, the condition  
854 median z-score was used. From these protein condition medians, we took the median value across the  
855 known subset of proteins to estimate a condition median to build a consensus profile. Using the consensus  
856 profile median values for known autophagy proteins as predicted, we then calculated the RMSE for each  
857 protein in the data sets.

858  $(RMSE = \sqrt{\sum_{i=1}^{TMT^n} \frac{(Predicted_i - Observed_i)^2}{n^{TMTchannels}}})$ . By calculating the RMSE for every quantified protein, we

859 generated a group of candidate 'autophagy' proteins in two distinct starvation conditions based on the top  
860 10% of proteins with the lowest RMSE across the datasets respectively. The 10% cutoff aligns well with  
861 the right most tail of the density plot for the known autophagy fluxers and the Top30 autophagy factors  
862 from **Figure 2**. While the resulting 'autophagy' candidate list provides a defined collection of autophagy  
863 substrates, the RMSE calculation averages the error across a protein's abundance profile, potentially  
864 enabling some proteins that vary from the consensus profile in a single condition to make the candidate list.  
865 Also, some autophagy substrates with high replicate variance in abundance may not make the cutoff  
866 required despite largely following the known autophagy fluxer consensus profile.

867

#### 868 **Prioritization of 'autophagy' cargo:**

869 To prioritize the top candidate autophagy cargo, we ranked proteins based on their starvation and autophagy  
870 turnover (**Figure 1**) and proximity to ATG8 machinery (**Figure 2**). To calculate a rank for starvation and  
871 autophagy dependent turnover, we determined the priority value based on the lesser of either the absolute  
872 value of the WT log<sub>2</sub> fold change in protein abundance from EBSS/Untreated for log<sub>2</sub>(EBSS/UT) ≤ 0 or the  
873 ATG7<sup>-/-</sup> log<sub>2</sub>(EBSS/UT) – WT log<sub>2</sub>(EBSS/UT) for changes ≥ 0 (when both criteria are met). Proteins that  
874 did not meet both criteria were assigned a 0 priority. The priority values were then arranged in descending  
875 order and proteins were scaled ranked (Protein Rank/Number of total proteins in the experiment). Scaled  
876 ranks were calculated for HeLa and HEK293 data separately and the minimum scaled rank found in at least  
877 one of the datasets was used. Proteins were reordered based on priority and scaled ranked combining the  
878 two datasets to summarize **Figure 1** findings. For ATG8 proximity ranks, we determined a priority value  
879 based on the lesser of either the log<sub>2</sub> fold change in protein abundance from WT EBSS+Baf/Untreated for

880  $\log_2(\text{EBSS+BafA/UT}) \geq 0$  or the absolute value of the ATG8 LSD mutant  $\log_2(\text{EBSS+BafA/UT}) - \text{WT}$   
881  $\log_2(\text{EBSS+BafA/UT})$  for changes  $\leq 0$  (only when both criteria are met). As above, proteins that did not  
882 meet both criteria were assigned a 0 priority. Using the priority values, scaled ranks were calculated for the  
883 APEX2-GABRAPL2 and APEX2-MAP1LC3B experiments separately, where the minimum scaled rank  
884 found in at least one of the experiments was used. Proteins were reordered based on priority and scaled  
885 ranked combining the two datasets to summarize **Figure 2** findings. To prioritize to candidates that were  
886 both turning over in an autophagy and starvation dependent manner and increased association with ATG8  
887 during starvation, we summed **Figure 1** and **Figure 2** scaled ranks to generate a summed rank value that  
888 we sorted by in ascending order to generate our final ranked list of candidates. To be a candidate in the final  
889 ranked list the protein must have been identified in at least one experiment from **Figure 1** experiments  
890 (HeLa or HEK293) and one experiment from **Figure 2** experiments (APEX2-GABRAPL2 and APEX2-  
891 MAP1LC3B). LIR motifs were matched from iLIR Autophagy Database  
892 (<http://repeat.biol.ucy.ac.cy/iLIR/>) (19). Known autophagy proteins were derived from (10).  
893

#### 894 **Reproducibility**

895 All experiments were repeated at least three times unless otherwise indicated.  
896

#### 897 **Data reporting**

898 No statistical methods were used to predetermine sample size. The experiments were not randomized, and  
899 the investigators were not blinded to allocation during experiments and outcome assessment.

900

901

902 SUPPLEMENTARY FIGURES:

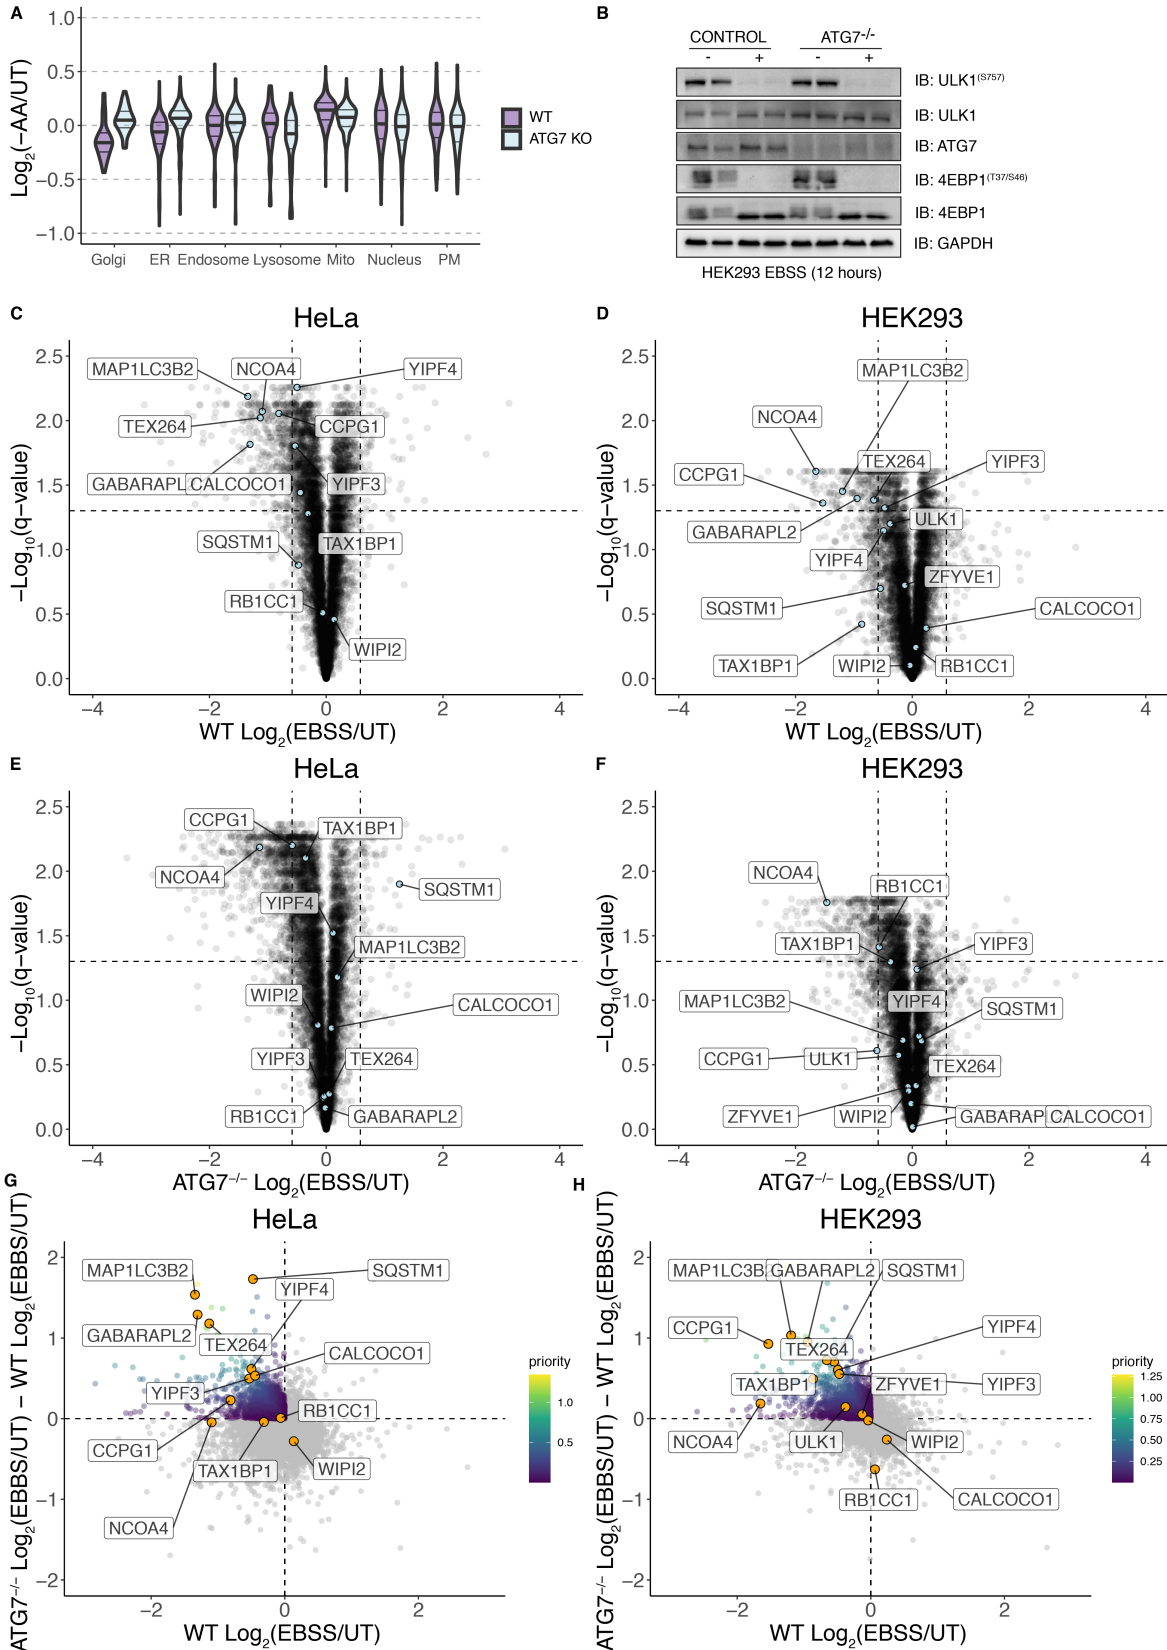



903 **fig. S1.** (A) Volcano plots for the indicated organelles in HEK293T cells with or without ATG7 in response  
904 to amino acid withdrawal (10 hours). Data are from our prior studies (5, 13). (B) Western blot showing  
905 markers of starvation (ULK1, 4EBP dephosphorylation) and ATG7 in WT and ATG7<sup>-/-</sup> HEK293 cells  
906 grown in EBSS for 12 hours. (C-F) Volcano plots [WT Log<sub>2</sub>(12 hours EBSS/UT) versus -Log<sub>10</sub>(q-value)]  
907 for HeLa (panel C) or HEK293 (panel D) or analogous plots for ATG7<sup>-/-</sup> HeLa (panel E) or HEK293 (panel  
908 F) cells. (G,H) Plots of ATG7<sup>-/-</sup> Log<sub>2</sub>(EBSS/UT) - WT Log<sub>2</sub>(EBSS/UT) versus WT Log<sub>2</sub>(EBSS/UT) for  
909 HeLa cells (panel E) and ATG7<sup>-/-</sup> Log<sub>2</sub>(EBSS/UT) - WT Log<sub>2</sub>(EBSS/UT) versus WT Log<sub>2</sub>(EBSS/UT) for  
910 HEK293 cells (panel D) where priority for individual proteins is scaled based on the color code inset.

911

912

913

914

915

916

917

918

919

920

921

922

923

924

925

926

927

928

929

930

931

932

933

934

935

936

937

938

939

940

941

942

943

944

945

946

947

948

949  
950

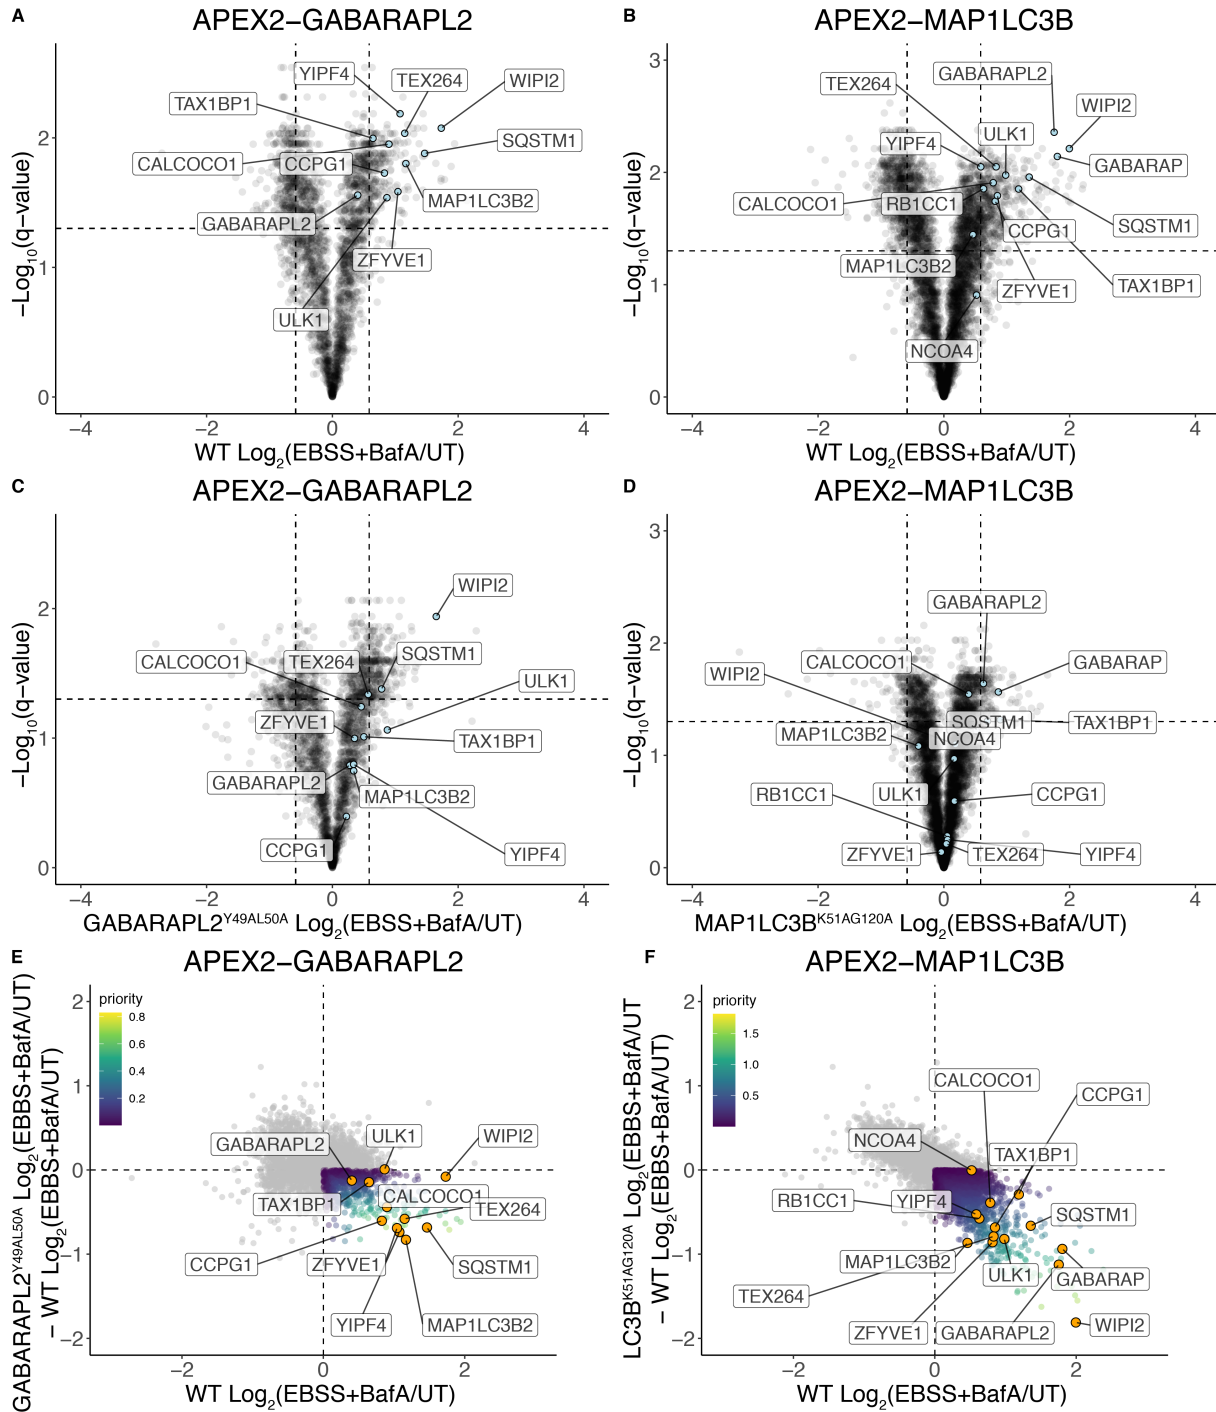

951  
952  
953  
954  
955  
956  
957

**fig. S2.** (A-D) Volcano plots [WT Log<sub>2</sub>(4 hours EBSS+BafA/UT) versus -Log<sub>10</sub>(q-value)] for APEX2-GABARAPL2 (panel A) or APEX2-MAP1LC3B (panel B) or analogous plots for APEX2-GABARAPL2<sup>Y49A/L50A</sup> (panel C) or APEX2-MAP1LC3B<sup>K51A/G120A</sup> (panel D) in HeLa cells. (E, F) Plots of GABARAPL2<sup>Y49A/L50A</sup> Log<sub>2</sub>(EBSS+BafA/UT) - WT Log<sub>2</sub>(EBSS+BafA/UT) versus WT

958  $\text{Log}_2(\text{EBSS+BafA/UT})$  (panel E) and  $\text{MAP1LC3B}^{\text{K51A/G120A}}$   $\text{Log}_2(\text{EBSS+BafA/UT}) - \text{WT}$   
959  $\text{Log}_2(\text{EBSS+BafA/UT})$  versus WT  $\text{Log}_2(\text{EBSS+BafA/UT})$  (panel F) where priority for individual proteins  
960 is scaled based on the color code inset.  
961

962  
963

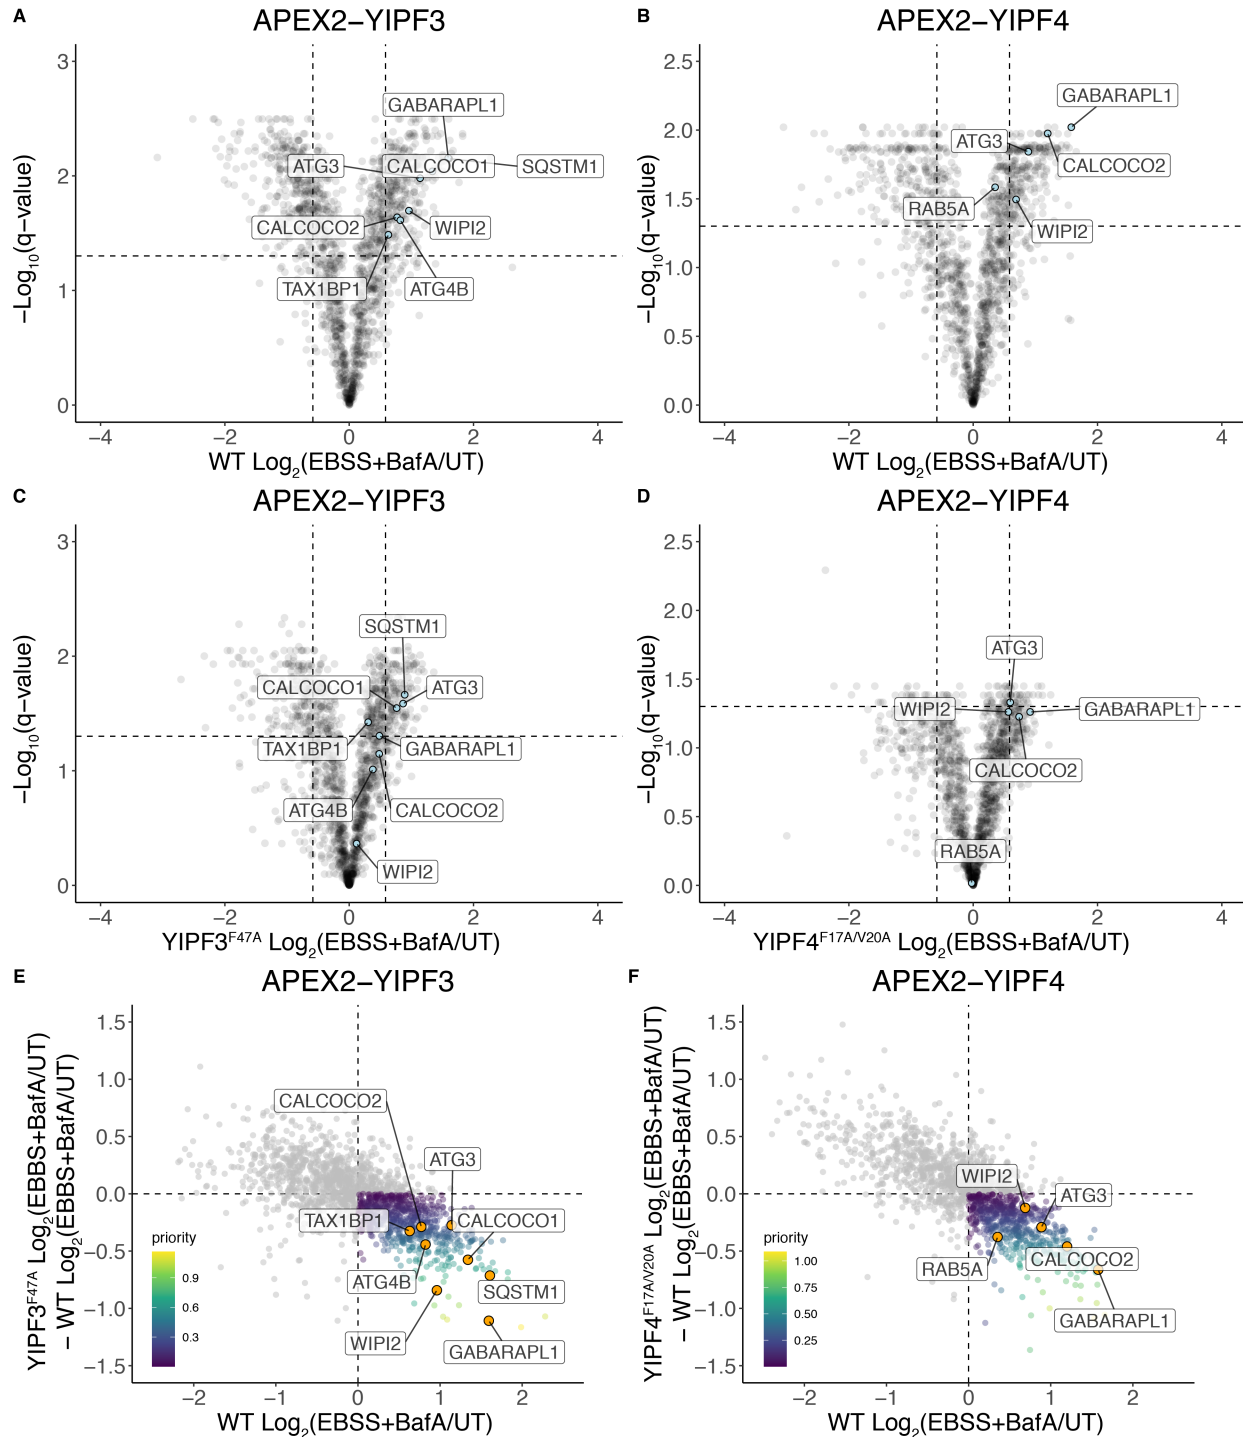

964  
965

966 **Fig. S3.** (A-D) Volcano plots [WT Log<sub>2</sub>(4 hours EBSS+BafA/UT) versus -Log<sub>10</sub>(q-value)] for APEX2-  
 967 YIPF3 (panel A) or APEX2-YIPF4 (panel B) or analogous plots for APEX2-YIPF3<sup>F47A</sup> (panel C) or  
 968 APEX2-YIPF4<sup>F17A/V20A</sup> (panel D) in HeLa cells. (E, F) Plots of APEX2-YIPF3<sup>F47A</sup> Log<sub>2</sub>(EBSS+BafA/UT)  
 969 WT Log<sub>2</sub>(EBSS+BafA/UT) versus WT Log<sub>2</sub>(EBSS+BafA/UT) (panel E) and APEX2-YIPF4<sup>F17A/V20A</sup>

970  $\text{Log}_2(\text{EBSS+BafA/UT})$  WT  $\text{Log}_2(\text{EBSS+BafA/UT})$  versus WT  $\text{Log}_2(\text{EBSS+BafA/UT})$  (panel F) where  
971 priority for individual proteins is scaled based on the color code inset.  
972

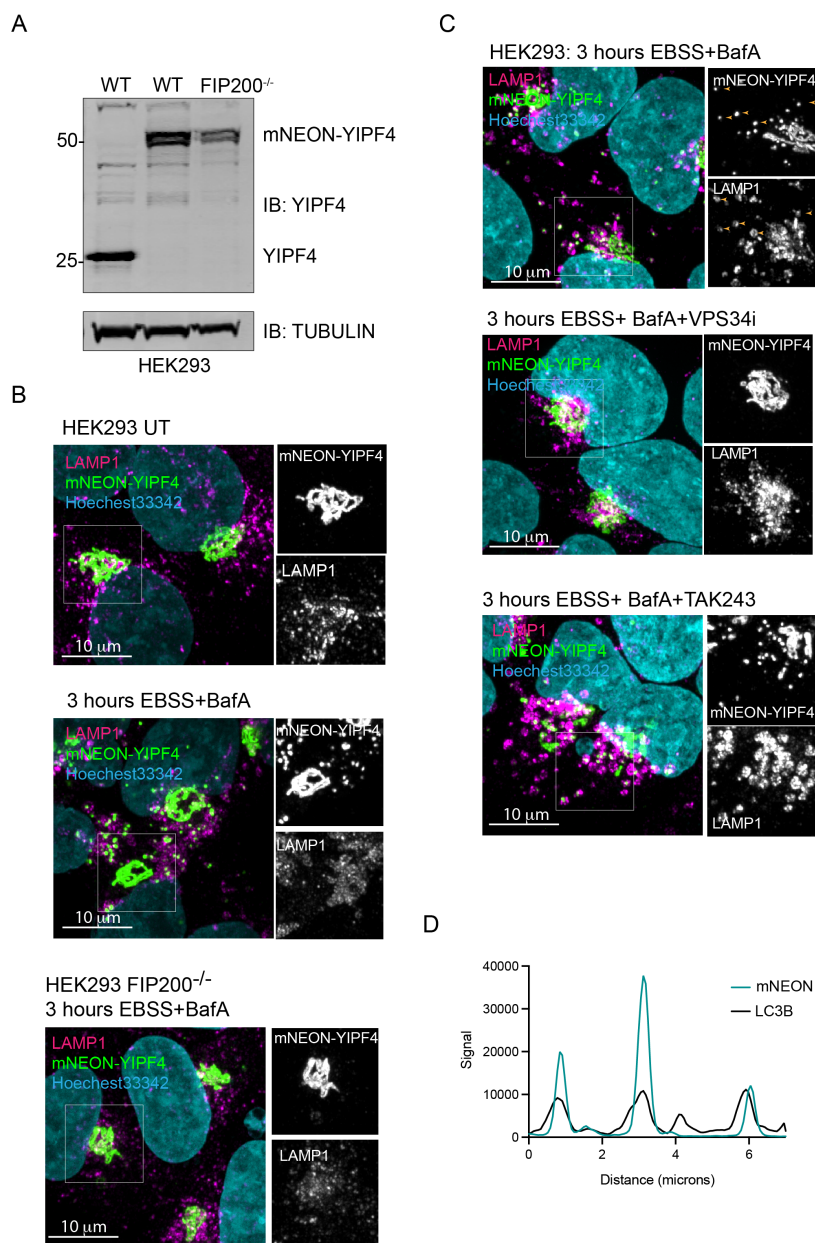

973  
974  
975  
976  
977  
978  
979  
980  
981  
982  
983  
984  
985  
986

**fig. S4.** (A) Immunoblot showing mNEON-YIPF4 endogenous tagging results at a higher molecular weight indicative of the total fusion protein length (~50kDa). (B) HEK293 cells expressing endogenous YIPF4 tagged on its N-terminus with mNEON (green) imaged using confocal microscopy and co-stained with LAMP1 (magenta). Cells were either left untreated (top) or subjected to nutrient stress +BafA (3 hours) in wt or FIP200<sup>-/-</sup> cells (middle and bottom) prior to imaging. Nuclei were labeled with Hoechst33342 dye (cyan). Scale bars 10 microns as indicated. (C) HEK293 cells expressing endogenous YIPF4 tagged on its N-terminus with mNEON (green) imaged using confocal microscopy and co-stained with LAMP1 (magenta). Cells were either left untreated (top) or subjected to nutrient stress +BafA and VPS34i (3 hours) (middle) or subjected to nutrient stress +BafA and an E1 inhibitor (TAK243) (3 hours) prior to imaging. Nuclei were labeled with Hoechst33342 dye (cyan). Scale bars 10 microns as indicated. (D) Line scan of HEK293 cells expressing endogenous YIPF4 tagged on its N-terminus with mNEON and MAP1LC3B show colocalization upon EBSS+BafA treatment for 3 hours.

987

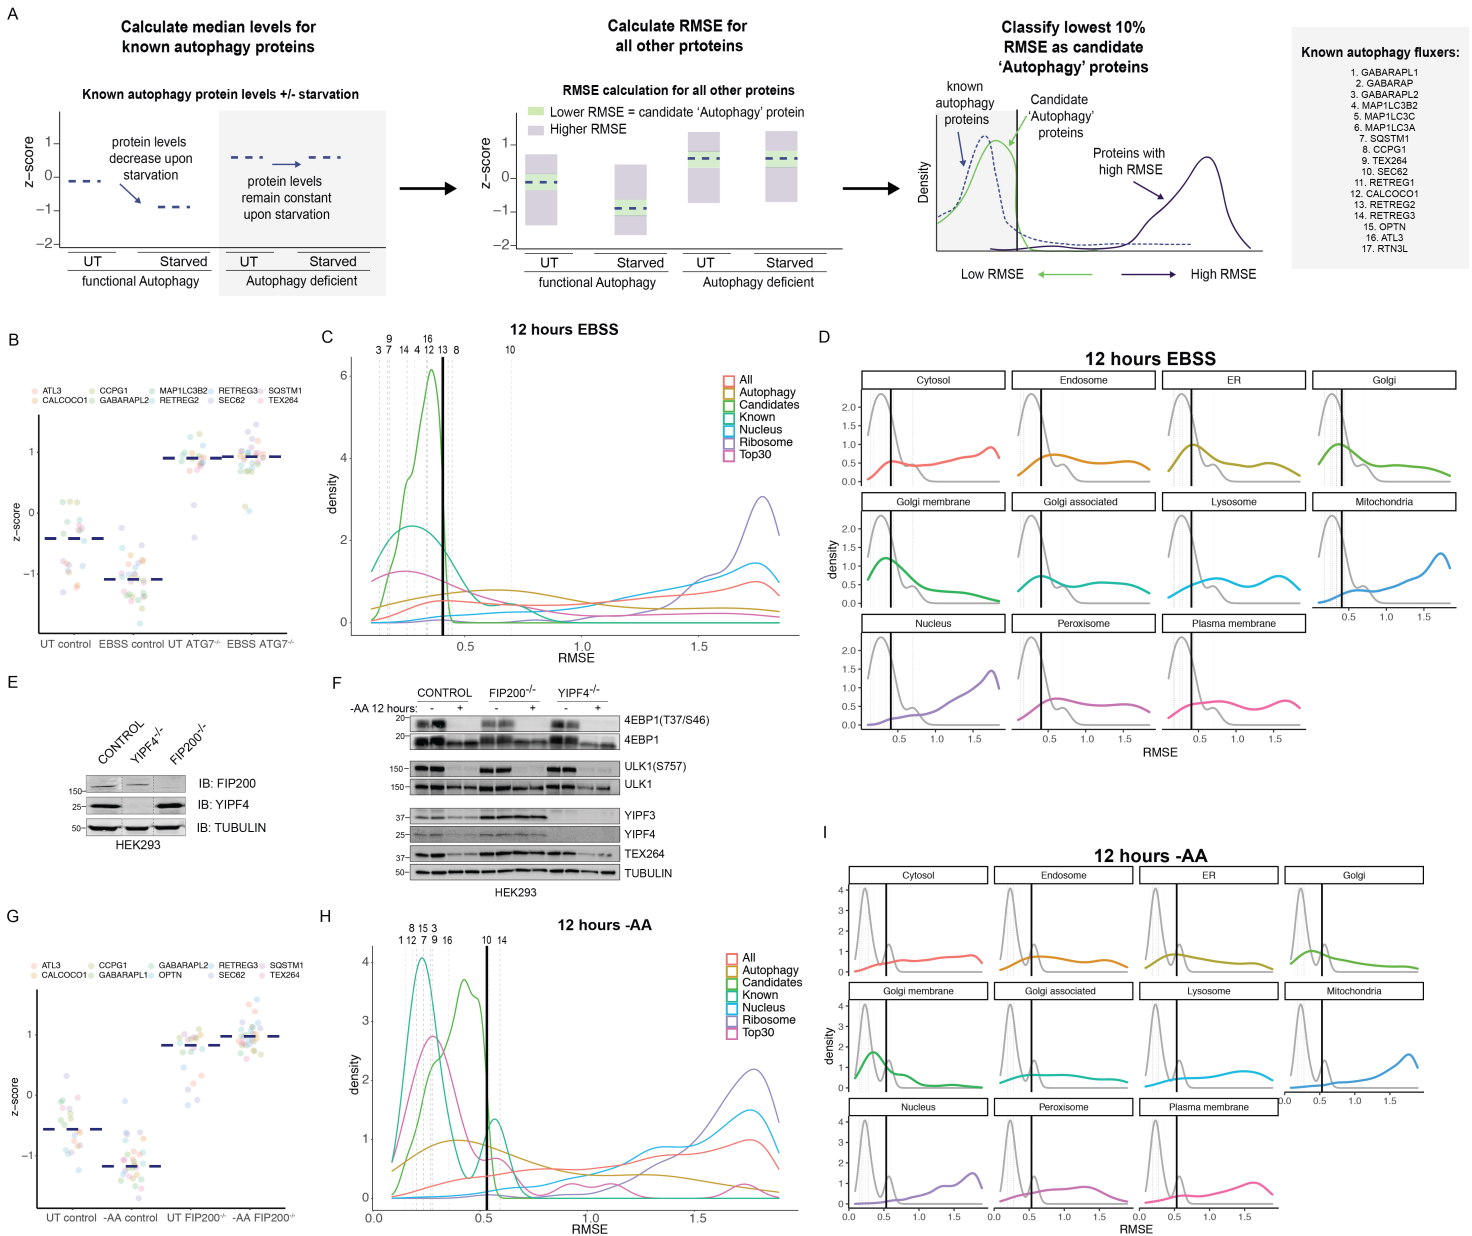

988

989 **fig. S5. (A)** Workflow for calculating RMSE of all proteins in HEK293 Control or ATG7<sup>-/-</sup> cells treated  
 990 with EBSS for 12 hours, and HEK293 control, FIP200<sup>-/-</sup>, and YIPF4<sup>-/-</sup> cells treated with AA withdrawal for  
 991 12 hours. Known autophagy fluxers are shown on the right. **(B)** Dot plot of known autophagy fluxers in  
 992 WT or ATG7<sup>-/-</sup> HEK293 cells treated with EBSS for 12 hours. Navy dashed line represents median protein  
 993 abundance. **(C)** RMSE plot for HEK293 cells treated with 12 hours of EBSS. Known autophagy proteins  
 994 RMSE is shown. Top30 shows the top 30 proteins from the autophagy prioritization list generated from  
 995 figures 1 and 2. Candidate 'Autophagy' proteins are shown along with all autophagy, nuclear, and  
 996 ribosomal proteins. Grey vertical dashed lines represent each known autophagy fluxer quantified in the  
 997 experiment, numbers represent the proteins according to panel A. **(D)** RMSE for each compartment shown  
 998 from HEK293 EBSS experiment. **(E)** Immunoblot for control, FIP200<sup>-/-</sup>, and YIPF4<sup>-/-</sup> cells with the  
 999 indicated antibodies. **(F)** Immunoblot for HEK293 control, FIP200<sup>-/-</sup> and YIPF4<sup>-/-</sup> cells with or AA

1000 withdrawal for 12 hours in duplicate with the indicated antibodies. **(G)** Dot plot of known autophagy fluxers  
1001 in WT or ATG7<sup>-/-</sup> HEK293 cells treated with EBSS for 12 hours. Navy dashed line represents median  
1002 protein abundance. **(H)** RMSE plot for HEK293 cells treated with 12 hours of AA withdrawal. Known  
1003 autophagy proteins RMSE is shown. Top30 shows the top 30 proteins from the autophagy prioritization list  
1004 generated from figures 1 and 2. Candidate ‘Autophagy’ proteins are shown along with all autophagy,  
1005 nuclear, and ribosomal proteins. **(I)** RMSE for each compartment shown from HEK293 AA withdrawal  
1006 experiment.



1007  
1008

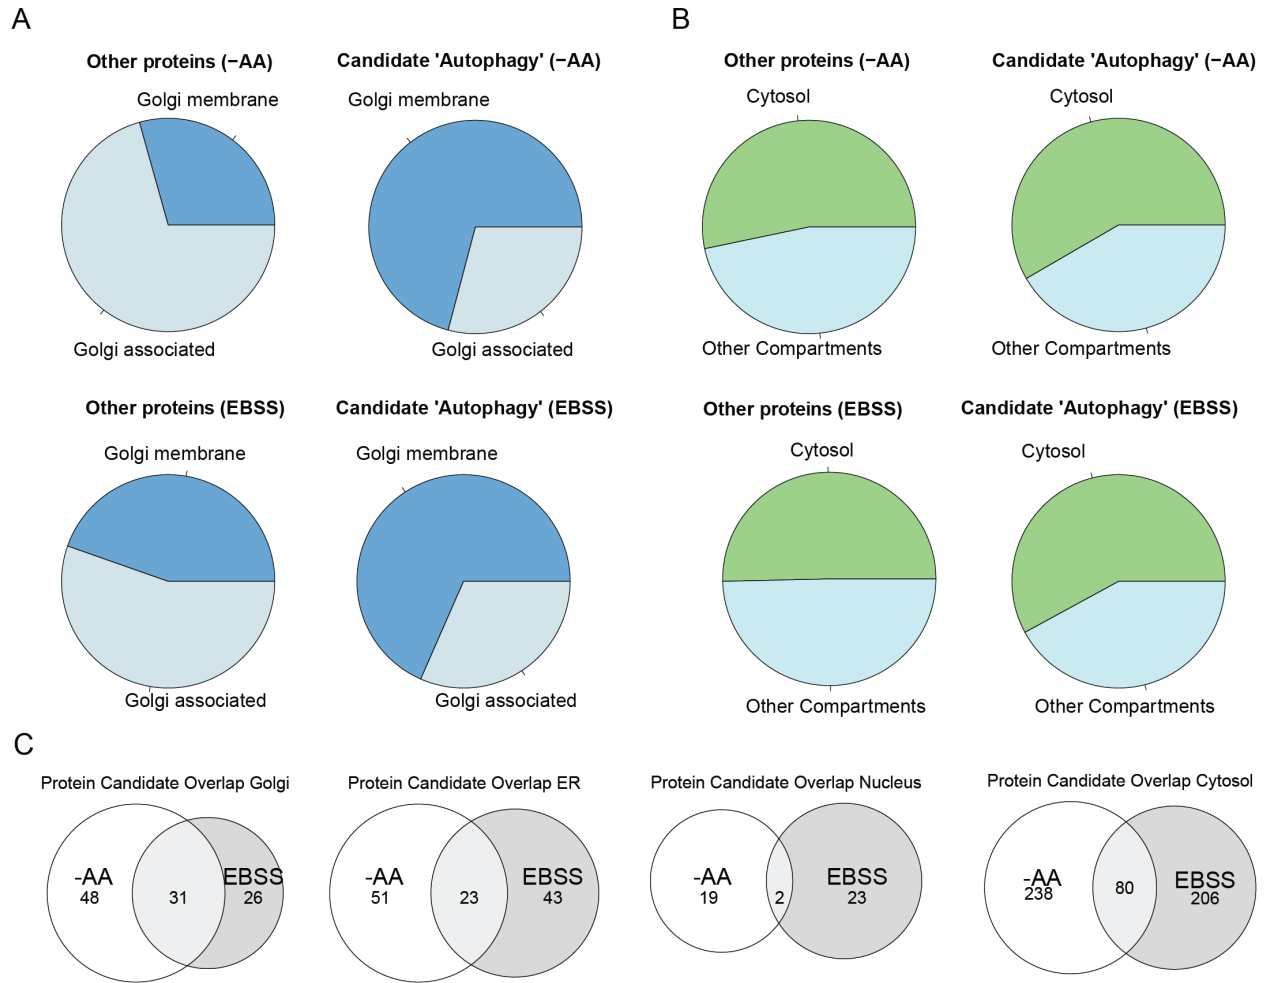

1009  
1010  
1011  
1012  
1013  
1014  
1015  
1016

**fig. S6.** (A) Enrichment of Golgi-membrane and Golgi-associated proteins in the candidate ‘autophagy’ list and all other proteins for AA withdrawal and EBSS treatment. (B) Enrichment for the cytosolic proteins in the candidate ‘autophagy’ list and all other proteins for AA withdrawal and EBSS treatment. (C) Venn diagrams indicating the overlap of proteins identified in common within candidate ‘autophagy’ lists for AA withdrawal and EBSS treatment. Numbers within the diagram indicate the number of proteins present.

1017

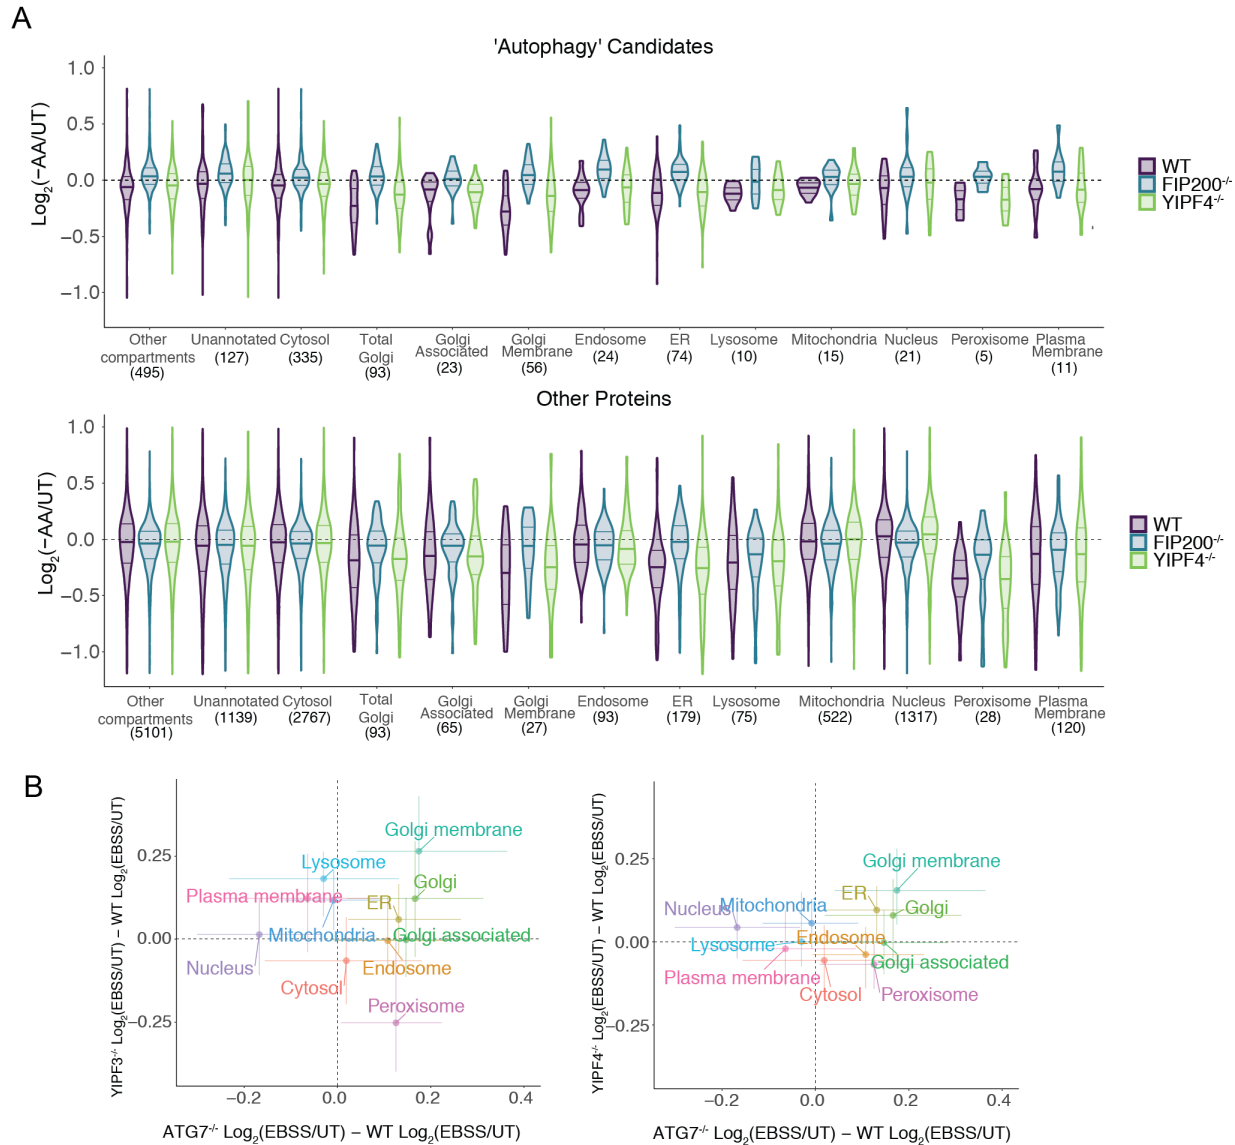

1018  
1019  
1020  
1021  
1022  
1023  
1024  
1025  
1026  
1027

**fig. S7.** (A) Violin plots for  $\text{Log}_2(-\text{AA}/\text{UT})$  for control,  $\text{FIP200}^{-/-}$ , or  $\text{YIPF4}^{-/-}$  HeLa cells displayed for various classes of proteins with the indicated sub-cellular localizations for either the ‘autophagy’ candidates or all other proteins from **fig. S5**. Median values are indicated by solid bold line. (B) Correlation plot for alterations in protein abundance for proteins in the indicated sub-cellular compartments in HeLa cells after 18 hours of EBSS for  $\text{YIPF3}^{-/-}/\text{WT}$  or  $\text{YIPF4}^{-/-}/\text{WT}$  cells (y-axis) versus  $\text{FIP200}^{-/-}/\text{WT}$  cells (x-axis).

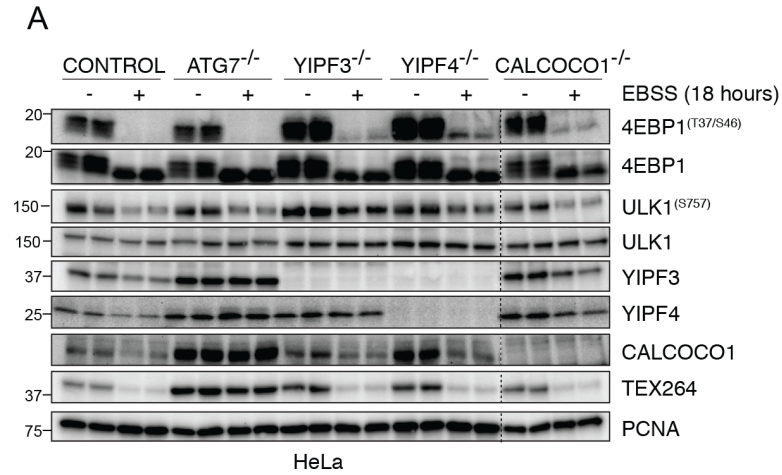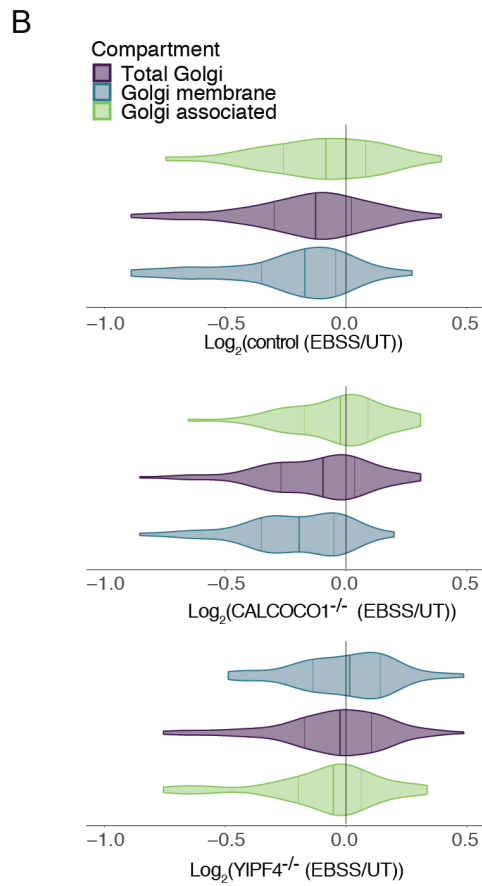

1028  
1029

1030 **fig. S8.** (A) Immunoblots of whole cell extracts from the indicated HeLa control and mutant cells in  
1031 duplicate either left untreated or subjected to EBSS for 18 hours using the indicated antibodies.  $\alpha$ -PCNA  
1032 was used as a loading control. (B) Violin plot for Golgi-membrane protein Log<sub>2</sub> FC with or without 18  
1033 hours of EBSS in control, YIPF4<sup>-/-</sup> or CALCOCO1<sup>-/-</sup> HeLa cells. Mean abundance is indicated by bold line.

1034

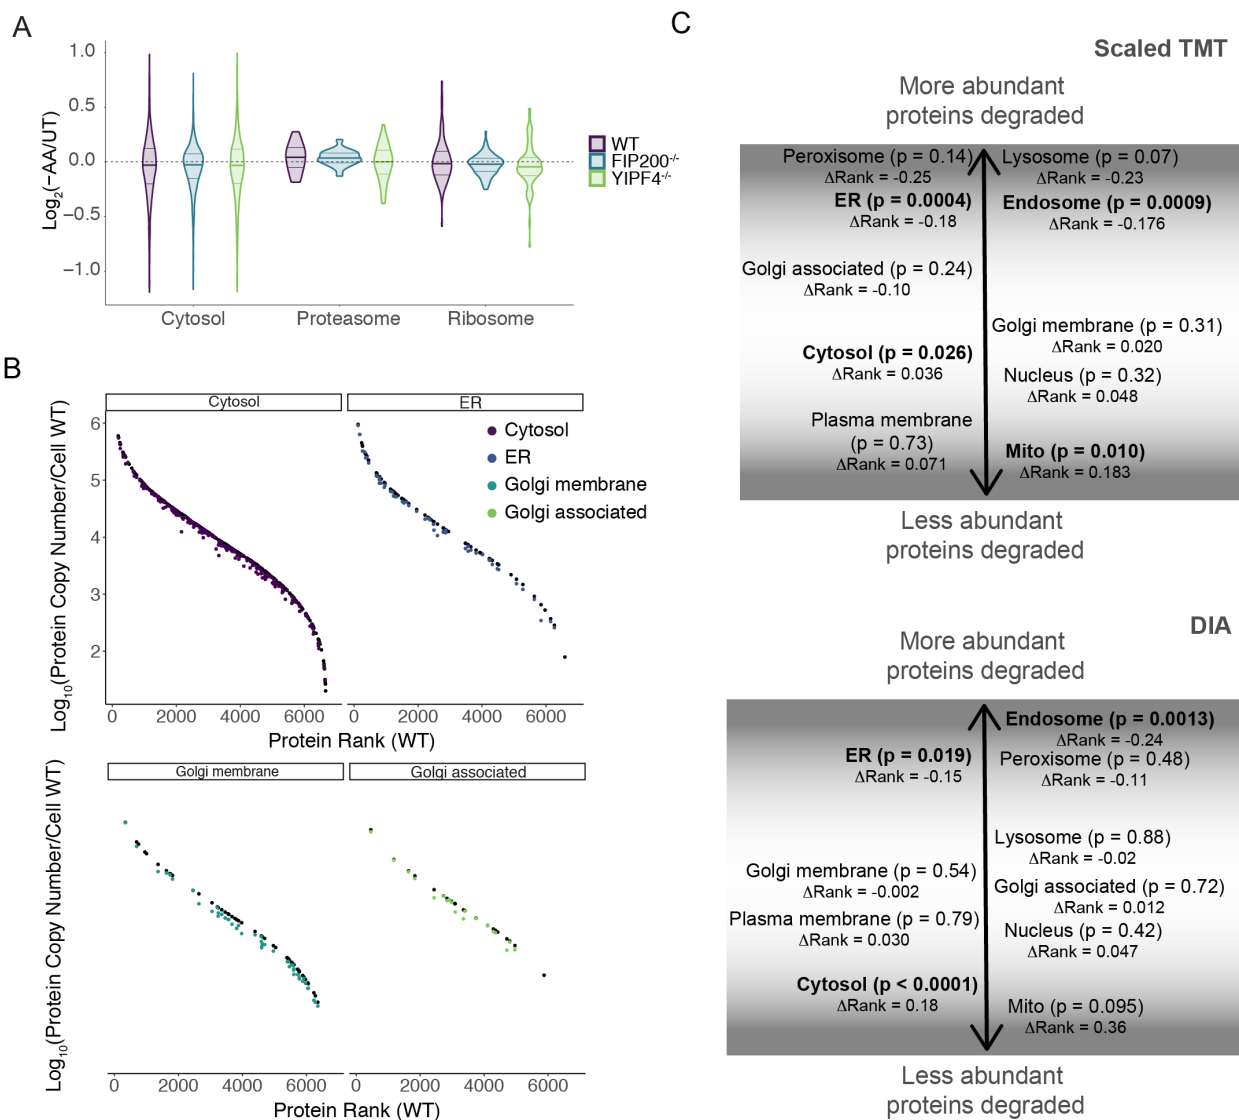

1035  
 1036  
 1037  
 1038  
 1039  
 1040  
 1041  
 1042  
 1043  
 1044  
 1045

**fig. S9.** (A) Violin plots for  $\text{Log}_2\text{FC} (-\text{AA}/\text{UT})$  for control, FIP200<sup>-/-</sup>, or YIPF4<sup>-/-</sup> HeLa cells displayed for 38 proteasome and 84 ribosomal proteins as well as proteins annotated as cytosolic. Median values are indicated by solid bold line. (B) Rank plot for cytoplasmic, ER and Golgi localized proteins. (C) Model for possible selectivity of macroautophagy at the organelle level. Abundance rank change ( $\Delta\text{Rank}$ ) between proteins in the 'autophagy' candidate list – all other proteins for each organelle, scaled to number of total proteins in both scaled TMT and DIA experiments. For each compartment, p-values are listed and organelles with significant differences are in bold.

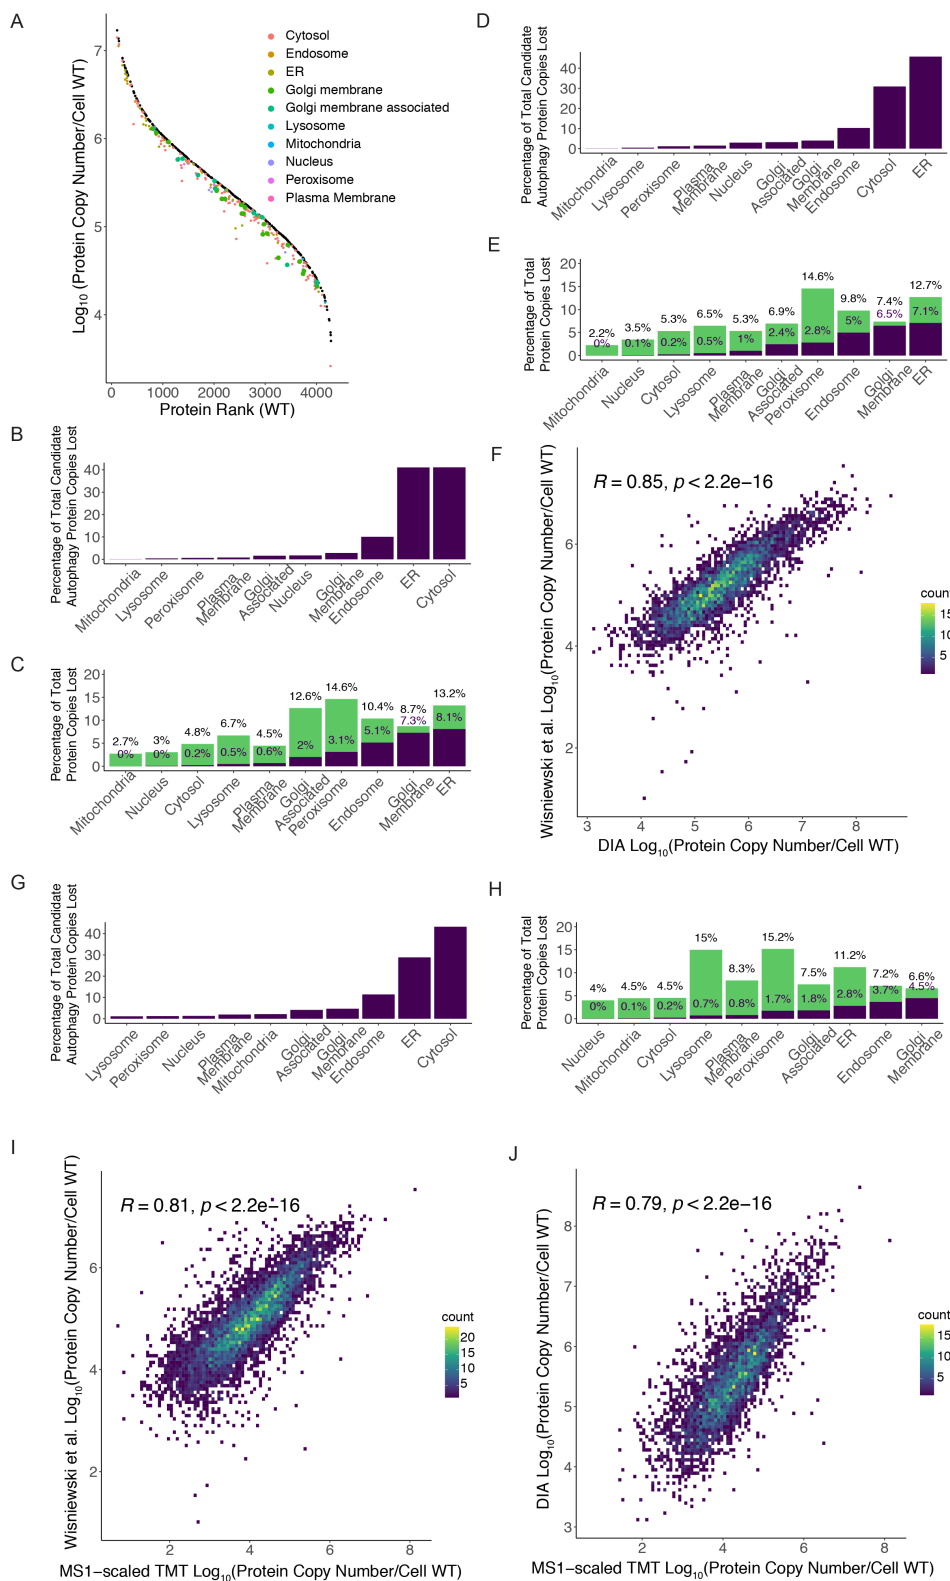

1046  
1047  
1048  
1049

**fig. S10.** (A) DIA ranked plots. Protein copy number in the untreated condition for candidate ‘autophagy’ proteins in HEK293 cells (black) in rank order. The number of protein copies after loss by autophagy during amino acid starvation for each compartment as determined using protein abundance fold changes (AA

1050 withdrawal – untreated) by DIA. **(B)** Among the candidate autophagy proteins, percentage of total protein  
1051 copy numbers lost via amino acid withdrawal ( $3.0161 \times 10^7$  total). **(C)** Percentage of all protein copies lost  
1052 from ‘autophagy’ candidate list (purple) or other mechanisms (green) by amino acid withdrawal for  
1053 subcellular compartments based on DIA values with histone-based proteome ruler values. **(D-E)** Same as  
1054 **B-C** respectively but based on DIA FC values mapped onto proteome ruler values from Wisniewski et al  
1055 (28) ( $9.77 \times 10^6$  total). **(F)** Correlation with DIA protein copy number estimates against Wisniewski et al  
1056 (28) protein copy numbers. **(G-H)** Same as **B-C** respectively, based on TMT-scaled FC values mapped onto  
1057 proteome ruler values from Wisniewski et al (28) ( $7.1573 \times 10^6$  total). **(I)** Correlation plots for TMT-scaled  
1058 MS1 protein signals against Wisniewski et al (28) copy number. **(J)** Correlation plots for TMT-scaled MS1  
1059 protein copy numbers and DIA protein copy numbers.  
1060

A

### CARGO : Cellular Autophagy Regulation and GOLgiphagy

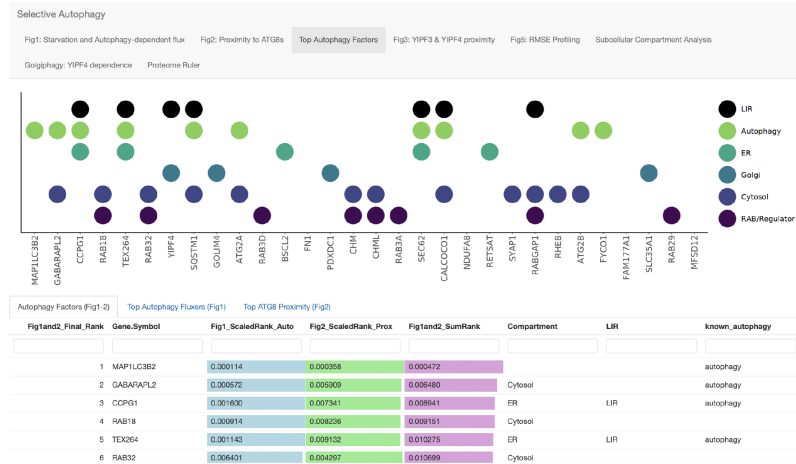

B

### CARGO : Cellular Autophagy Regulation and GOLgiphagy

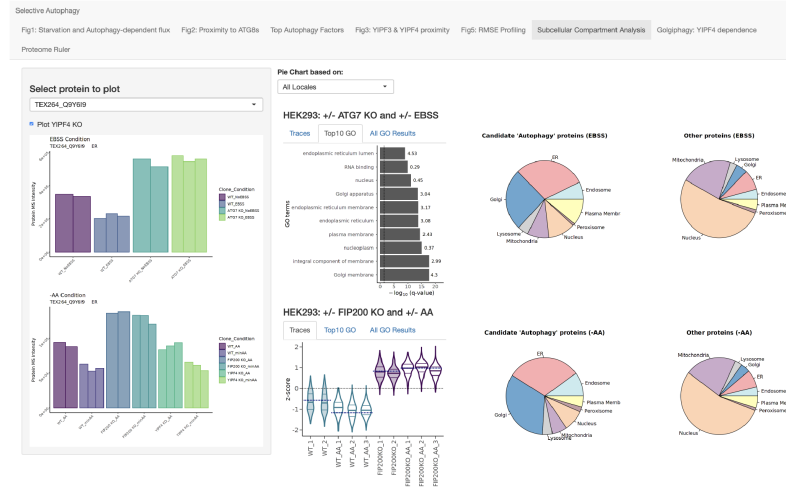

C

### CARGO : Cellular Autophagy Regulation and GOLgiphagy

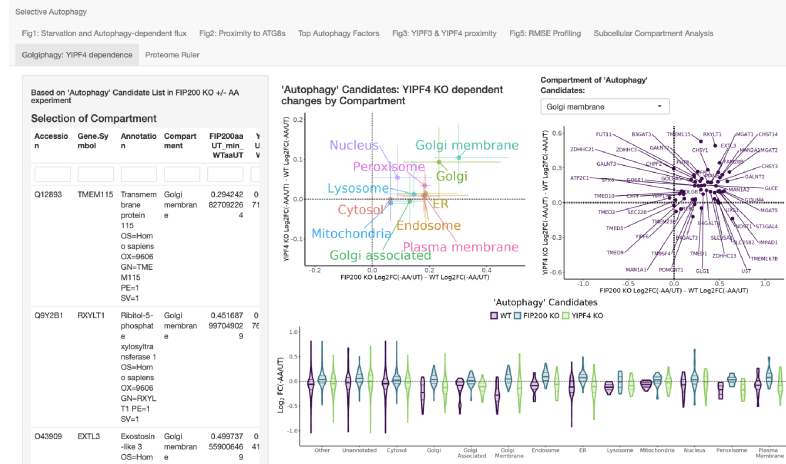

1061  
1062  
1063

1064 **fig. S11. CARGO: an interactive website to interrogate Cellular Autophagy Regulation and**  
1065 **Golgiphagy data from this work.** The website can be found at:  
1066 [https://harperlab.connect.hms.harvard.edu/CARGO\\_Cellular\\_Autophagy\\_Regulation\\_GOlgiphagy/](https://harperlab.connect.hms.harvard.edu/CARGO_Cellular_Autophagy_Regulation_GOlgiphagy/). (A)  
1067 Example of visualization data combining Figure 1 and Figure 2 to create a priority list of putative autophagy  
1068 factors. (B) Example of visualization data for Top Autophagy Fluxers and subcellular compartment analysis  
1069 (Related to Figure 5). (C) Example of visualization tools for mapping Golgiphagy and autophagy clients.
